1 **Analytical treatment interruption after short-term anti-retroviral therapy in a**  
2 **postnatally SHIV infected infant rhesus macaque model.**

3

4 Ria Goswami<sup>a</sup>, Ashley N. Nelson<sup>a</sup>, Joshua J. Tu<sup>a</sup>, Maria Dennis<sup>a</sup>, Liqi Feng<sup>b</sup>, Amit  
5 Kumar<sup>a</sup>, Jesse Mangold<sup>a</sup>, Riley J. Mangan<sup>a</sup>, Cameron Mattingly<sup>c</sup>, Alan D. Curtis II<sup>d,e</sup>,  
6 Veronica Obregon-Perko<sup>c</sup>, Maud Mavigner<sup>c</sup>, Justin Pollara<sup>f</sup>, George M. Shaw<sup>g</sup>,  
7 Katharine J. Bar<sup>g</sup>, Ann Chahroudi<sup>c,h</sup>, Kristina De Paris<sup>d,e</sup>, Cliburn Chan<sup>i</sup>, Koen K.A. Van  
8 Rompay<sup>j</sup>, and Sallie R. Permar<sup>a,k #</sup>.

9

10 <sup>a</sup>Duke Human Vaccine Institute, Duke University Medical Center, Durham, North  
11 Carolina, USA.

12 <sup>b</sup>Duke Clinical Research Institute, Duke University Medical Center, Durham, North  
13 Carolina, USA.

14 <sup>c</sup>Department of Pediatrics, Emory University School of Medicine, Atlanta, Georgia, USA

15 <sup>d</sup>Department of Microbiology and Immunology, School of Medicine, University of North  
16 Carolina at Chapel Hill, Chapel Hill, North Carolina, USA

17 <sup>e</sup>Center for AIDS Research, School of Medicine, University of North Carolina at Chapel  
18 Hill, Chapel Hill, North Carolina, USA

19 <sup>f</sup>Department of Surgery, Duke University School of Medicine, Durham, North Carolina,  
20 USA.

21 <sup>g</sup>Department of Medicine, University of Pennsylvania, Philadelphia, Pennsylvania, USA

22 <sup>h</sup>Emory+Children's Center for Childhood Infections and Vaccines, Atlanta, Georgia, USA

23 <sup>i</sup>Department of Biostatistics and Bioinformatics, Duke University Medical Center,  
24 Durham, North Carolina, USA.

25 <sup>j</sup>California National Primate Research Center, University of California, Davis, CA, USA

26 <sup>k</sup>Department of Pediatrics, Duke University School of Medicine, Durham, North  
27 Carolina, USA.

28

29 Running Title: ART interruption in SHIV-infected infant macaques.

30

31 # Address correspondence to Sallie R. Permar, [sallie.permar@duke.edu](mailto:sallie.permar@duke.edu)

32 R.G. and A.N.N. contributed equally to this work.

33

34 Abstract word count: 235

35 Text word count: 5631

36

37

38

39

40

41

42

43

44

45

46 **ABSTRACT.**

47

48 To achieve long-term viral remission in HIV-infected children, novel strategies beyond  
49 early anti-retroviral therapy (ART) will be necessary. Identifying clinical predictors of  
50 time to viral rebound upon ART interruption will streamline the development of novel  
51 therapeutic strategies and accelerate their evaluation in clinical trials. However,  
52 identification of these biomarkers is logistically challenging in infants, due to sampling  
53 limitations and potential risks of treatment interruption. To facilitate identification of  
54 biomarkers predicting viral rebound, we have developed an infant rhesus macaque  
55 (RM) model of oral SHIV.CH505.375H.dCT challenge and analytical treatment  
56 interruption (ATI) after short-term ART. We used this model to characterize SHIV  
57 replication kinetics and virus-specific immune responses during short-term ART or post-  
58 ATI and demonstrated plasma viral rebound in 5 out of 6 (83%) infants. We observed a  
59 decline in humoral immune responses and partial dampening of systemic immune  
60 activation upon initiation of ART in these infants. Furthermore, we documented that  
61 infant and adult macaques have similar SHIV replication and rebound kinetics and  
62 equally potent virus-specific humoral immune responses. Finally, we validated our  
63 models by confirming a well-established correlate of time to viral rebound, namely pre-  
64 ART plasma viral load, as well as identified additional potential humoral immune  
65 correlates. Thus, this model of infant ART and viral rebound can be used and further  
66 optimized to define biomarkers of viral rebound following long-term ART as well as to  
67 pre-clinically assess novel therapies to achieve a pediatric HIV functional cure.

68

69 **IMPORTANCE.**

70

71 Novel interventions that do not rely on daily adherence to ART are needed to achieve  
72 sustained viral remission for perinatally infected children who currently rely on lifelong  
73 ART. Considering the risks and expense associated with ART-interruption trials,  
74 identification of biomarkers of viral rebound will prioritize promising therapeutic  
75 intervention strategies, including anti-HIV Env protein therapeutics. However,  
76 comprehensive studies to identify those biomarkers are logistically challenging in  
77 human infants, demanding the need for relevant non-human primate models of HIV  
78 rebound. In this study, we developed an infant RM model of oral Simian/Human  
79 Immunodeficiency virus infection expressing clade C HIV Env, and short-term ART  
80 followed by ATI, longitudinally characterizing immune responses to viral infection during  
81 ART and post-ATI. Additionally, we compared this infant RM model to an analogous  
82 adult RM rebound model and identified virologic and immunologic correlates of time to  
83 viral rebound post-ATI.

84

85 Word limit: 150

86 Word count: 141

87

88

89

90

91

92 **INTRODUCTION.**

93

94 Despite the widespread availability and effectiveness of antiretroviral therapy (ART),  
95 each year >180,000 infants continue to become infected with HIV (1). Acquiring HIV at  
96 this early age commits these children to life-long ART, since stopping therapy is  
97 universally associated with viral rebound. However, continuous access to ART can be  
98 challenging in resource-limited settings (2), leading to treatment interruption and poor  
99 clinical outcomes. Maintaining adherence to life-long therapy is particularly challenging  
100 among adolescents (3), resulting in the development of drug resistant viral strains (4).  
101 Even if adherence is maintained, chronic exposure to ART from a young age  
102 predisposes children to drug-associated metabolic complications (5). Therefore, novel  
103 intervention strategies that do not rely on daily ART will be needed for sustained viral  
104 remission in infected children. While the establishment of viral reservoirs may not be  
105 prevented even when ART is initiated within hours of HIV infection (6), a reduced size of  
106 the latent reservoir has been demonstrated to lengthen time to viral rebound in clinical  
107 trials (7-9). Therefore, reducing the size of the viral reservoir and attaining sustained  
108 viral remission after treatment discontinuation has been the focus of an emerging global  
109 effort aimed at developing a cure for HIV infection.

110

111 As new therapeutic interventions to attain drug-free viral remission are developed and  
112 assessed in clinical trials, safe means to measure their efficacy will be needed. While  
113 mathematical models to predict viral rebound time from reservoir size have been  
114 developed (10-12), this approach is limited by the inaccuracy of existing assays to

115 measure viral reservoir size (13) and inter-patient variability in response to identical  
116 treatment strategies. Therefore, careful monitoring of viral rebound after analytical  
117 treatment interruption (ATI) still remains the “gold standard” to accurately validate the  
118 efficacy of any novel HIV therapeutic strategy. However, this approach is logistically  
119 challenging and carries considerable risk of virus transmission and replenishment of  
120 viral reservoir upon reactivation. More importantly, this strategy will be ethically  
121 challenging in HIV-infected children, since the outcome of ATI studies on long-term  
122 pediatric health are not known. Considering these risks, identification of biomarkers to  
123 serve as predictors of time to HIV rebound (14) would be useful to prioritize  
124 development of treatment strategies, avoiding the cost and risk of ATI studies that are  
125 unlikely to have clinical efficacy.

126  
127 Virologic and immunologic biomarkers predicting HIV rebound have been identified by  
128 several studies in recent years (15-18). Yet, our understanding of the predictors of HIV  
129 rebound in the setting of maturing infant immune systems is limited. These types of  
130 comprehensive studies are further complicated in infants due to limited volumes of  
131 samples that can be collected at this age. Thus, pediatric rhesus macaque (RM) models  
132 of HIV infection and treatment can be instrumental (19). Building on pediatric RM  
133 models of breast milk transmission (20) and persistence (21) with simian  
134 immunodeficiency viruses (SIVs), here we have developed a pediatric RM model of  
135 ART and viral rebound using infant RMs experimentally infected with a next generation  
136 chimeric simian-human immunodeficiency virus, SHIV.CH505.375H.dCT (22), that  
137 would permit an assessment of interventions directed against the HIV-Env. This virus

138 carries a mutation in the CD4 binding site that facilitates entry via rhesus CD4 molecule  
139 that has been previously demonstrated to replicate efficiently in adult RMs (22),  
140 recapitulating the viral replication dynamics and immunopathogenesis of HIV infection in  
141 humans (23). We used the infant RM model to characterize the replication kinetics and  
142 virus-specific humoral immune responses during short-term ART and after ATI. We also  
143 utilized a unique opportunity to compare the viral and immune response kinetics of  
144 infant monkeys to that of adults infected with the same virus, during ART and post-ATI.  
145 Furthermore, we validated and assessed these RM models by examining clinically  
146 established biomarkers of time to viral rebound and explored the relationship between  
147 immune response and viral rebound. This infant RM ATI model will be a valuable  
148 addition to the HIV cure research toolbox to guide translational studies for evaluating  
149 the efficacy of therapeutic strategies towards attaining drug-free HIV remission for  
150 children.

151

152

153

154

155

156

157

158

159

160

161 **RESULTS.**

162

163 **Kinetics of SHIV.CH505.375H.dCT replication in orally infected infant RMs.** Six  
164 infant RMs were orally challenged with SHIV.CH505.375H.dCT (22), as described in  
165 methods. Kinetics of SHIV replication in these infants were monitored for 12 weeks post  
166 infection (w.p.i), when they were initiated on a daily subcutaneous ART regimen of  
167 tenofovir disoproxil fumerate (TDF), emtricitabine (FTC), and dolutegravir (DTG) for 8  
168 weeks. After 8 weeks of ART, treatment was interrupted and infants were monitored for  
169 an additional 8 weeks followed by necropsy (Figure 1A).

170 In the acute phase of infection, plasma viral load (VL) peaked at 2 w.p.i ( $6.7 \times 10^5$ -  
171  $3.2 \times 10^7$  vRNA copies/mL of plasma), and then declined over time (Figure 1B). Most of  
172 the RMs did not achieve a stable VL set point, and 2 had plasma VL < limit of detection  
173 (LOD) of 15 copies/mL before ART initiation (Table 1). Of note, 1 of these 2 infants was  
174 most resistant to infection (Table 1), and neither had an MHC allele previously  
175 associated with SHIV control (24, 25) (Table S1). CD4<sup>+</sup> T cell frequencies were  
176 generally stable, with a slight decrease in the median frequency between 2-3 w.p.i.  
177 (Figure S1A), similar to the transient peripheral CD4<sup>+</sup> T cells decline in acute HIV  
178 infection.

179 Upon ART initiation, the infant RMs demonstrated plasma VL < LOD within 1-4  
180 weeks and none of them had detectable plasma VLs during the short course of ART.  
181 Upon ATI, 5 of 6 infants had viral rebound within 1-6 weeks (median: 3 weeks), of which  
182 2 demonstrated plasma VL < LOD, within 2-3 weeks of viral rebound (Table 1).  
183 Interestingly, 1 of the 2 animals with VL < 15 copies prior to ART (46367), experienced



184 viral rebound, post-ATI (Figure 1B). Not surprisingly, the animal with persistently high  
185 pre-ART viremia (46352) was the first to rebound post-ATI and experienced the highest  
186 rebound viremia.

187

188 **SHIV.CH505.375H.dCT reservoir in peripheral lymph nodes (LNs) and PBMCs of**  
189 **infant RMs.** We assessed the size of viral reservoirs of infant RMs while they were  
190 virologically controlled on ART. SHIV DNA was quantified in peripheral LN-associated  
191 naïve, memory, and T follicular helper (Tfh) CD4+ T cells after 8 weeks of ART. Viral  
192 DNA was detected in all three CD4+ T cell populations in a subset of animals, with 4 of  
193 6 monkeys having detectable DNA in naïve CD4+ T cells, 3 of 6 monkeys in memory  
194 CD4+ T cells, and 2 of 6 monkeys in Tfh cells (Figure 1C). Finally, we measured cell-  
195 associated SHIV-DNA (CA-SHIV DNA) and cell-associated SHIV-RNA (CA-SHIV RNA),  
196 per million CD4+ T cells isolated from PBMCs using digital droplet PCR (ddPCR). Of  
197 note, we could only report CA-SHIV DNA and CA-SHIV RNA data for those animals  
198 which had input cell counts greater than the threshold cell count for the assay (see  
199 methods). Our data demonstrated a decrease in CA-SHIV DNA (Figure 1D) and -SHIV  
200 RNA/million CD4+ T cells (Figure 1E), with only one infant (46352) having detectable  
201 CA-SHIV RNA, after 6 weeks of ART.

202

203 **Anatomic distribution of SHIV.CH505.375H.dCT post rebound in infant RMs.** As  
204 anatomic sites of viral replication after ATI might reveal major sources of viral rebound,  
205 we sought to determine the distribution of SHIV.CH505.375H.dCT in blood and tissue  
206 compartments, at necropsy. Cell-associated infectious SHIV was measured in oral and

207 gut-associated tissues (8 weeks post-ATI) using a Tzm-bl based co-culture assay  
208 (Figure S2), and 50% cellular infectious dose (CID<sub>50</sub>) for each tissue was reported (see  
209 methods). Our data demonstrated that the infectious virus was primarily distributed in  
210 the LNs and gut-associated tissues, compared to spleen (Figure 2A), which might be  
211 attributed to the lower proportion of CD4+ T cells in spleen (Figure S1B), vs. LNs.  
212 Interestingly, a higher number of animals had infectious virus detectable in oral LN  
213 (submandibular LN) compared to mesenteric LN and no cell-associated infectious virus  
214 was detected in PBMCs.

215         Eight weeks post-ATI, tissue-associated SHIV DNA and -RNA per million CD4+ T  
216 cells were detectable at variable levels (SHIV DNA: 1-3x10<sup>4</sup> copies/million CD4+ T cells  
217 and SHIV RNA: 1-8.61x10<sup>3</sup> copies/million CD4+ T cells) (Figure 2B and 2C). None of  
218 the monkeys had detectable SHIV RNA in PBMCs, further confirming our co-culture-  
219 based tissue-associated infectious viral load data. We further defined the anatomic  
220 distribution of CD3+SHIV+ cells in LN and gut-associated lymphoid tissues (GALT) of  
221 the infant that showed the highest plasma VL, post rebound, using a dual  
222 immunohistochemistry (IHC)/ in situ hybridization (ISH) approach (Figure 2D).  
223 Interestingly, CD3+SHIV+ cells were detected within the B cell follicles in addition to the  
224 T cell zone, suggesting that resident Tfh cells in both the tonsil and GALT can support  
225 viral replication.

226

227 **Adult RMs have comparable SHIV.CH505.375H.dCT replication kinetics, viral**  
228 **reservoir, and rebound-virus distribution compared to infants.** We took the  
229 opportunity to compare the viral replication kinetics and reservoir in infant RMs to that of

230 adult RMs infected with the same SHIV strain from a separate study, and thus a cohort  
231 of convenience (26). Six adult RMs, were intravenously infected with  
232 SHIV.CH505.375H.dCT (see methods) and started on triple ART regimen of TDF, FTC  
233 and DTG at 12 w.p.i. After 12 weeks of ART, therapy was discontinued, and the animals  
234 were euthanized 8 weeks post-ATI (Figure 3A). Similar to infant RMs, plasma VL in  
235 adults peaked at 2 w.p.i ( $3 \times 10^5$ - $1.2 \times 10^7$  copies of vRNA/mL of plasma). Additionally, the  
236 overall kinetics of plasma VL during acute SHIV infection was highly comparable  
237 between the two groups (Figure 3B). Upon ART initiation, plasma VL in adults was  
238 below LOD (<15 copies/mL plasma) within 1-4 weeks, with one monkey experiencing a  
239 viral blip (>15 copies/mL plasma), during the course of ART. Even though the ART  
240 regimen in adults was slightly longer than infants, 3 of 6 adults showed viral rebound  
241 within 2-3 weeks post-ATI. Interestingly, 1 of 3 adults that experienced viral rebound  
242 demonstrated plasma VL below LOD at 8 weeks post-ATI (Table 1).

243 SHIV reservoir was detectable in adults in naïve, memory, and Tfh CD4+ T cell  
244 subsets of peripheral LNs. (Figure 3C). As observed with infant RMs, CA-SHIV DNA  
245 (Figure 3D) and CA-SHIV RNA/million CD4+ T cells (Figure 3E) declined upon ART,  
246 with only 2 adults demonstrating detectable CA-SHIV DNA levels after 6 weeks on ART.  
247 Like infant RMs, co-culture assays detected higher infectious viral titers in oral LN  
248 (submandibular) compared to mesenteric LN, whereas cell-associated infectious virus  
249 was not detected in PBMCs (Figure 4A). CA-SHIV DNA and RNA were detected in  
250 tissues at variable levels, with none of the animals having detectable CA-SHIV RNA in  
251 PBMCs (Figure 4B and 4C). Similar to infants, the tonsils and colon lymphoid  
252 aggregates of the adult RM that showed highest plasma VL post-rebound had

253 detectable CD3+SHIV+ cells within the B cell follicle, in addition to T cell zone at  
254 necropsy (Figure 4D).

255

256 **Viral diversity before ART initiation and post-ATI in infant and adult RMs.** As the  
257 viral kinetics during acute infection, ART, and post-ATI were similar in infant and adult  
258 monkeys, we next sought to compare plasma viral Env diversity between the infant  
259 (46352) and adult RM (39950) that showed highest plasma VL post-rebound. We  
260 performed single genome amplification (SGA) and sequencing of the *env* gene pre-ART  
261 and post-ATI from plasma and calculated average pairwise distance (APD) within Env  
262 sequences. In the infant 46352, pre-ART (12 w.p.i) viral Env was more homogeneous  
263 (average pairwise distance: APD: 0.0006), compared to 2 weeks (APD: 0.0018) or 8  
264 weeks post-ATI viral Env (APD:0.0038) (Figure 5A). In contrast, for the adult 39950,  
265 pre-ART viral Env (12 w.p.i) had a 4-fold higher diversity (APD: 0.004), compared to 2  
266 weeks post-ATI viral Env (APD: 0.001) (Figure 5B).

267

268 **ART dampens the magnitude of humoral responses in SHIV-infected infant and**  
269 **adult RMs.** As previous reports have noted a loss of HIV-specific humoral responses in  
270 human infants on ART (27), we investigated differences in the kinetics, magnitude, and  
271 breadth of the Env-specific humoral responses on ART and following ATI between the  
272 age groups. In both age groups, all monkeys developed detectable autologous gp120-  
273 specific IgG responses at 12 w.p.i. (Figure 6A). After 8 weeks of ART, gp120-specific  
274 IgG response declined in both groups, the decline being more pronounced in infants.  
275 Yet, the gp120-specific IgG response rebounded in both groups post-ATI. Interestingly,

276 the infant (46359) with plasma VL<15 copies pre-ART and no viral rebound, developed  
277 similar gp120-specific IgG response to that of other infants. We then mapped the Env-  
278 domain specificity of the antibody responses, and observed dominant responses  
279 against the V3 and -C5 linear epitopes in both groups (Figure S3), which was not  
280 altered upon ART. Interestingly, ART initiation completely abrogated plasma antibodies  
281 against the CD4 binding site and only 2 of 6 infants and no adults regained this  
282 response within the 8 weeks of follow-up after ART was discontinued. (Figure 6B).

283 We next evaluated the HIV neutralization potency of RM plasma against a tier-1  
284 clade-matched isolate MW965 and the autologous tier-2 CH505 virus. Both infants and  
285 adults developed neutralization activity against MW965 by 12 w.p.i, which continued to  
286 increase post- ATI, with equal potency between age groups (Figure 6C). However, only  
287 half of both the adult and infant RMs had a detectable neutralization response against  
288 autologous CH505 at 12 w.p.i. (Figure 6D). Post-ATI, 2 of 6 infants and 4 of 6 adults  
289 demonstrated increasing neutralization responses against the autologous virus. In both  
290 age groups, gp120- specific ADCC titers dampened upon ART initiation, yet recovered  
291 to pre-ART levels after ATI (Figure 6E).

292  
293 **T cell activation during ART in infant and adult RMs.** Systemic immune activation  
294 has been associated with HIV replication and poor disease outcomes (28). Furthermore,  
295 T cell exhaustion markers have been reported as predictors of viral rebound in a human  
296 study (15). Therefore, we assessed the activation and exhaustion status of T cells from  
297 SHIV-infected, infant and adult RMs. Unlike adults, infant-activated, -proliferating and -  
298 exhausted CD4+ T cell populations increased at 10 w.p.i compared to pre-infection

299 levels, which might be attributed to the age-specific development of T cell populations  
300 (Figure 7A and 7B).

301 Furthermore, we measured the concentrations of inflammatory chemokines and  
302 cytokines in RM plasma pre-ART (12 w.p.i) and on ART (8 weeks of ART). While infant  
303 plasma demonstrated a higher magnitude and breadth of cytokine and chemokine  
304 levels than adults, no notable difference was observed pre-ART vs. on ART in both age  
305 groups (Figure 7C).

306

307 **Correlates of time to SHIV rebound in infant and adult RMs.** To validate our  
308 established RM SHIV rebound models in identifying correlates of time to viral rebound,  
309 we performed a univariate cox-proportional hazard modeling on a subset of the  
310 measured virologic and immunologic parameters, after adjustment for age. We defined  
311 time to viral rebound as a plasma VL >10 times LOD (150 copies/mL) post-ART  
312 discontinuation. Plasma VL pre-ART, ADCC antibodies, CD4+ CD69+ T cells and  
313 autologous virus neutralizing antibodies were pre-selected as primary parameters  
314 based on their previously published associations with rate of HIV acquisition (29, 30)  
315 and disease progression (31, 32). Of these parameters, higher levels of plasma VL pre-  
316 ART and ADCC antibody titers on ART demonstrated associations with increased risk  
317 of viral rebound (Table 2). Next, we applied the model on an additional set of virologic  
318 and immunologic parameters. The analysis identified higher levels of CH505 gp120-  
319 specific IgG responses pre-ART and on ART, tier-1 MW965 neutralizing antibody titer,  
320 and %sCD4 blocking antibodies pre-ART to be associated with higher risk of rebound

321 (Table 2), suggesting that our macaque models were suitable for monitoring correlates  
322 of viral rebound.

323 Finally, we wanted to determine the differential impact of age on the correlates of  
324 viral rebound. Due to the relatively small sample size of the two age groups, we  
325 performed Kendall's Tau rank correlation of each of the experimental parameters with  
326 viral rebound. In infants, lower plasma VL at ART start was associated with longer time  
327 to viral rebound and a correlation trend for longer time to viral rebound was observed for  
328 infant RMs with lower CH505 gp120-specific IgG responses pre-ART and on ART. In  
329 adults, lower values of plasma VL at ART start, peak plasma VL, CH505 gp120-specific  
330 IgG response pre-ART and Tier-1 MW965 neutralizing antibody titer at ART start were  
331 associated with longer time to rebound. Additionally, a correlation trend for longer time  
332 to viral rebound was observed for adult monkeys with lower CH505 gp120-specific IgG  
333 responses on ART (Table 3).

334

335

336

337

338

339

340

341

342

343

344 **DISCUSSION.**

345

346 Identification of plasma viral RNA (31) and CD4+ T cell counts (33) as surrogate  
347 markers of HIV disease progression were instrumental in the development of ART for  
348 attaining improved clinical care in HIV-infected patients. As the HIV field rapidly turns  
349 towards achieving functional “cure”, there has been renewed interest in identifying  
350 biomarkers of viral rebound. Monitoring biomarkers will guide clinical trials with effective  
351 therapeutic candidates, minimizing investment to those that are unlikely to result in  
352 delay of viral rebound. However, ATI trials for identification of biomarkers remain  
353 logistically challenging, particularly in children, necessitating the development of  
354 tractable pediatric animal models. While pediatric ATI models of SIV-infected RMs are  
355 not new to the HIV field (34), clinically translatable RM models of ATI using SHIVs have  
356 been advancing (35). Thus, we have sought to establish an oral SHIV-infected infant  
357 ATI model with a previously validated ART regimen (21).

358

359 This study investigated the impact of ART on SHIV replication and SHIV-specific  
360 immune responses in the context of the maturing infant immune system. Employing an  
361 adult RM SHIV-infected cohort of convenience, we also demonstrated that infant and  
362 adult RMs have a comparable SHIV replication kinetics and are equally equipped in  
363 mounting immune responses, both on ART and post-ATI. Furthermore, we validated our  
364 RM ATI models by confirming previously reported virologic correlates of rebound and  
365 identified additional potential humoral immune correlates.

366



367 In this study, the infant and adult RMs were infected with a clade C SHIV variant,  
368 SHIV.CH505.375H.dCT, due to the predominance of clade C viruses in sub-Saharan  
369 Africa, where most pediatric HIV infections occur (36). In both infant and adult models,  
370 this SHIV variant achieved a peak viral load comparable to previously described  
371 SIV/SHIV models (21, 37), yet did not achieve a viral “set point” in most of the monkeys  
372 (Figure 1B and 3B). Additionally, a few monkeys from our cohort achieved natural  
373 virologic control, which is not uncommon in previously described SHIV infection models  
374 (38, 39). Moreover, our study revealed a comparable plasma VL and rebound kinetics in  
375 the two age groups.

376

377 Previous studies have claimed that infants may have impaired immune responses to  
378 HIV infection compared to adults (40). However, we previously demonstrated that  
379 vaccination of infants can induce robust HIV Env-specific IgG responses (41).  
380 Moreover, we recently reported that infant monkeys are capable of mounting durable  
381 anti-HIV humoral immune responses during acute SHIV infection, despite their maturing  
382 immune landscape (26). In this study, we observed comparable humoral immune  
383 responses between the two age groups during ART and post-ATI (Figure 6).  
384 Interestingly, a decline of HIV gp120-specific IgG responses and ADCC responses were  
385 observed on ART, without a change in the specificities of the Env domain-specific  
386 antibodies (Figure S3). A similar observation was made in human infants, where HIV-  
387 specific antibody levels decreased as the duration of ART increased (42), suggesting  
388 that circulating HIV antigen is a major driving factor for production of HIV Env-specific  
389 antibodies. In fact, plasma Env-specific IgG levels could provide a more comprehensive

390 measure of viral replication in tissue sanctuaries which might not be reflected in the  
391 plasma viral load.

392

393 To identify correlates of viral rebound in infants and adults, we analyzed a  
394 comprehensive panel of 25 virologic and immunologic parameters. Our data confirmed  
395 a key, well-established clinical virologic marker, pre-ART plasma VL, as a correlate of  
396 viral rebound in both the age groups. Additionally, higher peak plasma VL was identified  
397 as a correlate of quicker viral rebound in adults, but not infants. This association of pre-  
398 therapy plasma VL with viral rebound has been demonstrated previously in an HIV gag-  
399 based therapeutic trial, where lower pre-ART plasma VL was independently associated  
400 with a lower post-ATI plasma VL (43). Among the immunologic parameters tested, in  
401 adults, higher gp120-specific IgG responses and neutralizing antibodies against a tier-1  
402 virus correlated with quicker viral rebound, whereas in infants higher gp120-specific IgG  
403 responses, but not neutralizing antibodies against a tier-1 virus showed a correlation  
404 trend with quicker viral rebound. There has been continued interest in considering anti-  
405 HIV gp120 responses as a screening marker for ongoing viral replication or  
406 breakthrough, during suppressive ART (44). Additionally, heterologous neutralizing  
407 antibody responses at the time of treatment interruption has been associated with  
408 reduced viral load over time (45). However, these identified humoral responses have  
409 not been previously associated with time to viral rebound, and therefore, should be  
410 examined in future long-term studies. In resource limited settings, monitoring HIV-  
411 specific humoral responses in infants on suppressive ART might be beneficial due to

412 small sample volume requirement and relatively low cost and technology burden  
413 compared to nucleic acid-based assays or quantitative viral outgrowth assays (QVOA).

414  
415 There were a few notable limitations of this pilot study. Firstly, the adult RM model of  
416 SHIV rebound used in the study was not originally designed for a direct comparison with  
417 the infant ATI model (e.g., infection route, infection dose and weeks of therapy were not  
418 precisely matched to the infant study). Yet, the availability of a comparable adult cohort  
419 infected with the same SHIV variant and similar viral replication kinetics provided us a  
420 unique opportunity to investigate the differences in infant immune responses during and  
421 after therapy with respect to adults. We also acknowledge that differences in the  
422 challenge route and duration of ART in adult RMs might have limited our ability to  
423 directly compare the immune responses in the two age groups. Moreover, relatively  
424 small cohort sizes likely contributed to our inability to identify some of the previously  
425 established immunologic parameters of viral rebound such as pre-therapy levels of T  
426 cell exhaustion markers: Tim-3, Lag-3 and PD-1 (15). Hence, further validation of this  
427 model in larger pediatric RM cohorts will be required. Secondly, since our cohorts were  
428 subjected to very short duration of ART (8-12 weeks), the measured viral reservoir  
429 might not be a reflection of the true persistent reservoir on long-term suppressive ART.  
430 Therefore, we have excluded measures of viral reservoir size, which have been  
431 identified as predictors of viral rebound in previous adult clinical trials (16-18, 46).  
432 Finally, low cell numbers collected, and the comprehensive nature of the study has  
433 restricted our ability to measure longitudinal T cell functions, potentially missing T cell  
434 function-associated correlates of viral rebound time.

435

436 In conclusion, this study validated an oral SHIV-infected pediatric infant RM model of  
437 ATI and characterized SHIV replication and humoral immune responses during and  
438 post-ATI. Larger and longer-term prospective studies will be needed to further optimize  
439 this model and identify a comprehensive set of biomarkers that can reliably predict time  
440 to viral rebound. Developing algorithms by combining several surrogate markers of viral  
441 rebound could greatly accelerate the process of screening children as candidates for  
442 ATI trials, and for development of novel therapeutics for HIV cure research. Additionally,  
443 an infant HIV rebound model will be a valuable tool to identify and evaluate the potency  
444 of novel therapeutic strategies for attaining functional cure in the context of the maturing  
445 infant immune system.

446

447

448

449

450

451

452

453

454

455

456

457

458 **MATERIALS AND METHODS.**

459

460 **Animal care and study design.** Type D retrovirus-, SIV- and STLV-1 free Indian  
461 rhesus macaques (RM) (*Macaca mulatta*) were maintained in the colony of California  
462 National Primate Research Center (CNPRC, Davis, CA), as previously described (47).  
463 Six infant RMs were orally challenged with SHIV.CH505.375H.dCT (22) as described in  
464 (26). Briefly, the infant RMs were challenged at 4 weeks of age by bottle feeding 3  
465 times/day for 5 days at a dose of  $8.5 \times 10^4$  TCID<sub>50</sub>, to mimic breast milk transmission.  
466 After one week of challenges, 1 infant became infected. The remaining 5 were sedated  
467 and orally challenged weekly at a dose of  $6.8 \times 10^5$  TCID<sub>50</sub>. Within three weeks, 4 more  
468 became infected and the final one was challenged at increasing doses ( $1.3 \times 10^6$  TCID<sub>50</sub>,  
469 followed by  $3.4 \times 10^6$  TCID<sub>50</sub>) until infected at 14 weeks of age (Table 1). Six adult RMs  
470 (age between 4-10 years), were intravenously infected with SHIV.CH505.375H.dCT at a  
471 dose of  $3.4 \times 10^5$  TCID<sub>50</sub> as described in (26). The plasma viral RNA load of the monkeys  
472 were assessed by highly sensitive qRT-PCR (48). A co-formulation containing 5.1  
473 mg/kg tenofovir disoproxil fumarate (TDF), 40 mg/kg emtricitabine (FTC) and 2.5 mg/kg  
474 dolutegravir (DTG) was prepared as described previously (49) and administered once  
475 daily by the subcutaneous route starting 8 weeks (infants) or 12 weeks (adults), post-  
476 infection (w.p.i).

477

478 **Collection and processing of blood and tissue specimens and MHC typing of**  
479 **animals.** Animals were sedated with ketamine HCl (Parke-Davis) injected at 10 mg/kg  
480 body weight. EDTA-anticoagulated blood was collected via peripheral venipuncture.

481 Plasma was separated from whole blood by centrifugation. Tissues were either fixed in  
482 formalin for *in situ* hybridization, or mononuclear cells were isolated from the tissues by  
483 density gradient centrifugation as described in (37). DNA extracted from splenocytes  
484 was used to screen for the presence of the major histocompatibility complex (MHC)  
485 class I alleles Mamu-A\*01 and -B\*01 and -B\*08, using a PCR-based technique (50, 51).

486

#### 487 **CD4<sup>+</sup> T cell subpopulation sorting and cell-associated SHIV DNA and RNA**

488 **quantification.** CD4<sup>+</sup> T cells were enriched from PBMCs and tissue mononuclear cells  
489 using a negative selection magnetic-activated cell sorting (MACS) system as per  
490 manufacturer's instructions (Miltenyi Biotec, Germany). Enriched CD4<sup>+</sup> T-cells were  
491 stained with fluorescently conjugated antibodies listed in Table S2, and sorted for naïve,  
492 memory and Tfh CD4<sup>+</sup> T cell subsets (Figure S4). Total RNA and genomic DNA were  
493 isolated using the RNeasy Mini Kit and DNeasy Blood and Tissue Kit, respectively  
494 (Qiagen, Germany). Viral cDNA was generated from the extracted total RNA using  
495 SuperScript III reverse transcriptase enzyme (Invitrogen, Carlsbad, CA), PCR  
496 nucleotides (NEB, MA) and Gag-specific reverse primer (Table S3). SHIV-DNA and  
497 RNA/million CD4<sup>+</sup> T cells in blood and necropsy tissues were estimated by amplifying  
498 cDNA and genomic DNA with primers and probes described in Table S3, using digital  
499 droplet PCR (ddPCR) as described in (37). The sensitivity of the ddPCR assay was  
500 estimated to be detection of 1 SHIV gag copy in 10,000 uninfected CD4<sup>+</sup> T cells.  
501 Therefore, an input CD4<sup>+</sup> T cell count of 10,000 was defined as threshold cell count  
502 (TCC) for the analysis, and samples having input cells < TCC were not analyzed. SHIV  
503 DNA/million CD4<sup>+</sup> T cells was estimated after normalizing SHIV gag copy numbers with

504 input CD4+ counts. Quantification of SHIV DNA in peripheral lymph node-associated  
505 naïve, memory and Tfh CD4+ T cell population was performed by qPCR as described in  
506 (21), using primers and probes described in Table S3.

507

508 **Measurement of HIV Env- specific antibody responses by Enzyme-Linked**

509 **Immunosorbent Assay (ELISA).** The plasma concentrations of HIV Env-specific

510 antibodies were estimated by ELISA, as previously described (29). Human CH22

511 monoclonal antibody was used as standard and the concentration of HIV Env-specific

512 IgG antibody was calculated relative to the standard using a 5-parameter fit curve

513 (SoftMax Pro 7). The positivity cut off for the assay was defined as the optical density

514 (OD) of the lowest-concentration rhesus IgG standard that was greater than three times

515 the average OD of blank wells. CD4 blocking ELISAs were done as described in (47).

516

517 **HIV-1 Env-specific IgG epitope specificity and breadth using binding antibody**

518 **multiplex assay (BAMA).** HIV antigens were covalently conjugated to polystyrene

519 beads (Bio-Rad), and binding of IgG to the bead-conjugated HIV-1 antigens was

520 measured in RM plasma samples (29). The antigens used for the assay have been

521 described in (26). Purified IgG from pooled plasma of HIV-1 vaccinated macaques

522 (RIVIG) was used as positive control.

523

524 **Neutralization assays.** Neutralization of MW965.LucR.T2A.ecto/293T IMC (clade C,

525 tier 1) and the autologous CH505.TF (clade C, tier 2) HIV-1 pseudovirus by plasma

526 antibodies was measured in TZM-bl cells as previously described (29, 52, 53). The ID<sub>50</sub>

527 was calculated as described in (26). The monoclonal antibody, b12R1, was used as a  
528 positive control for MW965 virus, and VRC01 was used a positive control for CH505 T/F  
529 virus.

530

531 **ADCC-GranToxiLux (GTL) Assay.** The ADCC-GTL assay was used to measure  
532 plasma ADCC activity as previously described (47, 54). CEM.NKR<sub>CCR5</sub> target cells were  
533 coated with recombinant CH505 gp120. Adult and infant plasma samples were tested  
534 after a 4-fold serial dilution starting at 1:100.

535

536 **Single Genome Amplification (SGA)** SGA of plasma virus was done as previously  
537 described (55). Primer used for cDNA preparation was SHIVEnv.R3out. A first round of  
538 PCR amplification was conducted using primers SIVmac.F4out and SHIVEnv.R3out A  
539 second round of PCR was conducted using primers SIVmac766.F2in and  
540 SIVmac766.R2in (Table S3). *Env* gene amplicons obtained were sequenced by Sanger  
541 sequencing, and phylogenetic tree were constructed for the aligned *env* gene  
542 sequences by neighbor-joining method using Seaview (56). Average pairwise distance  
543 was calculated using the MEGA6 software (57).

544

545 **Tissue-associated infectious viral titers by co-culture assay.** Serial dilutions of RM  
546 lymphoid and gut-associated mononuclear cells were co-cultured with Tzm-bl reporter  
547 cells as described previously (37) (Figure S2). Fifty percent cellular infectious dose  
548 (CID<sub>50</sub>) was calculated as the number of mononuclear cells per 10<sup>4</sup> mononuclear cells  
549 required to yield detectable infection of 50% Tzm-bl cells, using Reed-Muench method.



550 The detection threshold of the assay was established as 2.5 times the mean  
551 luminescence output of Tzm-bl only cells from 10 independent experiments (876 RLU).  
552  
553 ***In situ* hybridization (ISH).** Formalin fixed, paraffin embedded tissue sections were  
554 sequentially cut (5 µm) and stained for CD3 and CD20 (Table S2) as previously described  
555 (58, 59). SHIV RNA was visualized with the 1-Plex ViewRNA™ ISH Tissue Assay Kit  
556 using SIV<sub>mac239</sub> or Beta actin (positive control) probe sets and ViewRNA Chromogenic  
557 Signal Amplification Kit (ThermoFisher, Waltham, MA). These two sequential slides were  
558 individually imaged with a Zeiss AxioObserver microscope and AxioCam MRm camera.  
559 Composite overlays of CD3/CD20 stained slides with ISH slides were prepared using Zen  
560 Lite v2.3 software (Zeiss).

561  
562 **T cell phenotyping.** Phenotyping of rhesus PBMCs and tissue-associated  
563 mononuclear cells were performed as described previously (37). Fluorescently-  
564 conjugated antibodies used to stain cells are reported in Table S2. For intercellular  
565 staining, cells were fixed and permeabilized using eBioscience™ FoxP3/transcription  
566 factor staining buffer set (Thermo Fisher Scientific), according to manufacturer's  
567 instructions. The stained cells were acquired on an LSRII flow cytometer (BD  
568 Biosciences) using BD FACS Diva software and analyzed with FlowJo software version  
569 10 (Tree Star, Inc). Gating for all surface and intracellular markers (Figure S4) was  
570 based on fluorescence minus one (FMO) controls. Complete blood counts (CBC) were  
571 performed on EDTA-anticoagulated blood samples. Samples were analyzed using a  
572 Pentra 60C+ analyzer (ABX Diagnostics). Absolute lymphocyte counts in blood were

573 calculated using the PBMC counts obtained by automated complete blood counts,  
574 multiplied by the lymphocyte percentages.

575

576 **Multiplex analysis of plasma cytokines and chemokines.** Plasma cytokine and  
577 chemokine concentrations were assayed in duplicate using a MIP-1 $\alpha$  singleplex kit and  
578 a 22-analyte multiplex panel (G-CSF, GM-CSF, IFN- $\gamma$ , IL-1RA, IL-1 $\beta$ , IL-2, IL-4, IL-5, IL-  
579 6, IL-8, IL-10, IL-12/23 (p40), IL-13, IL-15, IL-17, IL-18, MCP-1, MIP-1 $\beta$ , sCD40L, TGF-  
580  $\alpha$ , TNF- $\alpha$ , VEGF) (both Millipore PRCYTOMAG-40K) performed according to the  
581 manufacturer's recommended protocol and read using a FlexMAP 3D array reader  
582 (Luminex Corp.). Data were analyzed using Bio-Plex Manager software (Bio-Rad).

583

584 **Statistical analysis.** Differences in immune assay measurements between pre-  
585 identified time points post-infection were performed by Wilcoxon signed-rank test using  
586 the R language and environment for statistical computing (60). Four responses were  
587 pre-selected as primary variables of interest. Additionally, 5 virologic and humoral  
588 response-associated variables and 16 T cell phenotype and plasma inflammatory  
589 response-associated variables were selected for exploratory analysis. Cox proportional  
590 hazards modeling was used to create univariate survival models for each variable,  
591 treating time to rebound as the event of interest. To account for differences between  
592 adult and neonate groups, a binary indicator for the two different groups was used as a  
593 control variable. To identify correlates of viral rebound in infants and adults, Kendall's  
594 tau between every variable of interest and the time to virus rebound was computed.

595 Raw p-values and/or FDR-adjusted (Benjamini-Hochberg) p-values, and hazard ratios  
596 with confidence intervals were reported for each variable.

597

## 598 **ACKNOWLEDGEMENTS.**

599

600 The work was supported by National Institutes of Health grants P01 AI117915 (S.R.P.  
601 and K.D.P.); 5R01 AI106380 (S.R.P.); T32 5108303 (A.D.C.) and 5R01-DE025444  
602 (S.R.P.). This work was also supported by the Penn Center for AIDS Research Viral  
603 and Molecular Core P30 AI045008 (K.J.B.); the BEAT-HIV: Delaney Collaboratory to  
604 Cure HIV-1 Infection by Combination Immunotherapy UM1AI126620 (K.J.B.); and  
605 CARE: Delaney Collaboratory for AIDS Eradication UM1AI126619 (K.J.B.) and the  
606 Office of Research Infrastructure Program/OD (P51OD11107; CNPRC). The research  
607 contributions by A.D.C. and K.D.P. were supported by the University of North Carolina  
608 at Chapel Hill Center for AIDS Research (CFAR), and NIH funded program P30  
609 AI050410. The funders had no role in study design, data collection and interpretation, or  
610 the decision to submit the work for publication. The content is solely the responsibility of  
611 the authors and does not necessarily represent the official views of the National  
612 Institutes of Health.

613 Several protein antigens for BAMAs and ELISAs were generously provided by  
614 Dr. Barton Haynes, supported by NIH NIAID Division of AIDS UM1 grant AI100645 for  
615 the Center for HIV/AIDS Vaccine Immunology-Immunogen Discovery (CHAVI-ID), and  
616 produced at the Duke Human Vaccine institute (DHVI) Protein Production Facility. We  
617 thank Dr. Jeff Lifson, Rebecca Shoemaker and colleagues in the Quantitative Molecular

618   Diagnostics Core of the AIDS and Cancer Virus Program of the Frederick National  
619   Laboratory for expert assistance with viral load measurements. We would like to thank  
620   Jennifer Watanabe, Dr. Amir Ardeshir and the staff of the CNPRC Colony Research  
621   Services for their support in these studies. We thank Emory University  
622   Pediatrics/Winship Flow Cytometry Core for technical assistance with CD4+ T cell  
623   subpopulation sorting and Center for AIDS Research at Emory University  
624   (P30AI050409) for qPCR assays. We thank Papa Kwadwo Morgan-Asiedu, Joshua A.  
625   Eudailey, Holly Heimsath and Shuk Hang (Grace) Li at DHVI for assisting with animal  
626   tissue processing. We would also like to thank DHVI Regional Biocontainment  
627   laboratory (RBL) for technical support with multiplex assay for measuring plasma  
628   cytokine response, and R. Whitney Edwards and Nicole Rodgers for performing ADCC  
629   assays. T cell phenotyping was performed in the DHVI Flow Cytometry Facility  
630   (Durham, NC).

631

632   **AUTHOR DISCLOSURE STATEMENT.** No competing financial interests.

633

634   **AUTHOR CONTRIBUTIONS.** R.G., A.N.N., K.D.P., K.K.A.V.R. and S.R.P. designed the  
635   study and interpreted the data; R.G., A.N.N., J.J.T., M.D., A.K., J.M., R.J.M., C.M.,  
636   A.D.C., V.O.P., M.V. and J.P. performed the experiments and analyzed the data; L.F.  
637   and C.C. performed the statistical analysis; G.M.S. and K.J.B. provided virus and  
638   consulted on the infection model; A.C., K.D.P. and K.K.A.V.R. contributed important  
639   insights for the interpretation and discussion of the results. R.G. and S.R.P. drafted the  
640   manuscript. All authors read and approved the final manuscript.

641

642 **REFERENCES.**

643

644 1. UNAIDS. Global HIV & AIDS statistics — 2018 fact sheet 2018. Available from:  
645 <http://www.unaids.org/en/resources/fact-sheet>.

646 2. UNAIDS. Access to antiretroviral therapy in Africa-Status report on progress  
647 towards the 2015 targets. Available from:

648 [http://www.unaids.org/sites/default/files/media\\_asset/20131219\\_AccessARTAfricaStatu](http://www.unaids.org/sites/default/files/media_asset/20131219_AccessARTAfricaStatusReportProgressTowards2015Targets_en_0.pdf)  
649 [sReportProgressTowards2015Targets\\_en\\_0.pdf](http://www.unaids.org/sites/default/files/media_asset/20131219_AccessARTAfricaStatusReportProgressTowards2015Targets_en_0.pdf).

650 3. Kim SH, Gerver SM, Fidler S, Ward H. Adherence to antiretroviral therapy in  
651 adolescents living with HIV: systematic review and meta-analysis. AIDS.

652 2014;28(13):1945-56. Epub 2014/05/23. doi: 10.1097/QAD.0000000000000316.

653 PubMed PMID: 24845154; PubMed Central PMCID: PMC4162330.

654 4. Viani RM, Peralta L, Aldrovandi G, Kapogiannis BG, Mitchell R, Spector SA, Lie  
655 YS, Weidler JM, Bates MP, Liu N, Wilson CM, Adolescent Medicine Trials Network for  
656 HIVAI. Prevalence of primary HIV-1 drug resistance among recently infected  
657 adolescents: a multicenter adolescent medicine trials network for HIV/AIDS

658 interventions study. The Journal of infectious diseases. 2006;194(11):1505-9. Epub  
659 2006/11/04. doi: 10.1086/508749. PubMed PMID: 17083034.

660 5. Barlow-Mosha L, Eckard AR, McComsey GA, Musoke PM. Metabolic  
661 complications and treatment of perinatally HIV-infected children and adolescents. J Int  
662 AIDS Soc. 2013;16:18600. Epub 2013/06/21. doi: 10.7448/IAS.16.1.18600. PubMed  
663 PMID: 23782481; PubMed Central PMCID: PMC4162330.

- 664 6. Luzuriaga K, Gay H, Ziemniak C, Sanborn KB, Somasundaran M, Rainwater-  
665 Lovett K, Mellors JW, Rosenbloom D, Persaud D. Viremic relapse after HIV-1 remission  
666 in a perinatally infected child. *The New England journal of medicine*. 2015;372(8):786-8.  
667 doi: 10.1056/NEJMc1413931. PubMed PMID: 25693029; PubMed Central PMCID:  
668 PMC4440331.
- 669 7. Yukl SA, Boritz E, Busch M, Bentsen C, Chun TW, Douek D, Eisele E, Haase A,  
670 Ho YC, Hutter G, Justement JS, Keating S, Lee TH, Li P, Murray D, Palmer S, Pilcher  
671 C, Pillai S, Price RW, Rothenberger M, Schacker T, Siliciano J, Siliciano R, Sinclair E,  
672 Strain M, Wong J, Richman D, Deeks SG. Challenges in detecting HIV persistence  
673 during potentially curative interventions: a study of the Berlin patient. *PLoS pathogens*.  
674 2013;9(5):e1003347. doi: 10.1371/journal.ppat.1003347. PubMed PMID: 23671416;  
675 PubMed Central PMCID: PMC3649997.
- 676 8. Henrich TJ, Hanhauser E, Marty FM, Sirignano MN, Keating S, Lee TH, Robles  
677 YP, Davis BT, Li JZ, Heisey A, Hill AL, Busch MP, Armand P, Soiffer RJ, Altfeld M,  
678 Kuritzkes DR. Antiretroviral-free HIV-1 remission and viral rebound after allogeneic stem  
679 cell transplantation: report of 2 cases. *Annals of internal medicine*. 2014;161(5):319-27.  
680 doi: 10.7326/M14-1027. PubMed PMID: 25047577; PubMed Central PMCID:  
681 PMC4236912.
- 682 9. Persaud D, Gay H, Ziemniak C, Chen YH, Piatak M, Jr., Chun TW, Strain M,  
683 Richman D, Luzuriaga K. Absence of detectable HIV-1 viremia after treatment cessation  
684 in an infant. *The New England journal of medicine*. 2013;369(19):1828-35. doi:  
685 10.1056/NEJMoa1302976. PubMed PMID: 24152233; PubMed Central PMCID:  
686 PMC3954754.

- 687 10. Hill AL, Rosenbloom DI, Fu F, Nowak MA, Siliciano RF. Predicting the outcomes  
688 of treatment to eradicate the latent reservoir for HIV-1. Proceedings of the National  
689 Academy of Sciences of the United States of America. 2014;111(37):13475-80. Epub  
690 2014/08/07. doi: 10.1073/pnas.1406663111. PubMed PMID: 25097264; PubMed  
691 Central PMCID: PMCPMC4169952.
- 692 11. Hill AL, Rosenbloom DI, Goldstein E, Hanhauser E, Kuritzkes DR, Siliciano RF,  
693 Henrich TJ. Real-Time Predictions of Reservoir Size and Rebound Time during  
694 Antiretroviral Therapy Interruption Trials for HIV. PLoS pathogens.  
695 2016;12(4):e1005535. Epub 2016/04/28. doi: 10.1371/journal.ppat.1005535. PubMed  
696 PMID: 27119536; PubMed Central PMCID: PMCPMC4847932.
- 697 12. Pinkevych M, Kent SJ, Tolstrup M, Lewin SR, Cooper DA, Sogaard OS,  
698 Rasmussen TA, Kelleher AD, Cromer D, Davenport MP. Modeling of Experimental Data  
699 Supports HIV Reactivation from Latency after Treatment Interruption on Average Once  
700 Every 5-8 Days. PLoS pathogens. 2016;12(8):e1005740. doi:  
701 10.1371/journal.ppat.1005740. PubMed PMID: 27560972; PubMed Central PMCID:  
702 PMC4999223.
- 703 13. Siliciano JD, Siliciano RF. Assays to Measure Latency, Reservoirs, and  
704 Reactivation. Current topics in microbiology and immunology. 2018;417:23-41. doi:  
705 10.1007/82\_2017\_75. PubMed PMID: 29071475.
- 706 14. Li JZ, Smith DM, Mellors JW. The need for treatment interruption studies and  
707 biomarker identification in the search for an HIV cure. AIDS. 2015;29(12):1429-32. Epub  
708 2015/04/15. doi: 10.1097/QAD.0000000000000658. PubMed PMID: 25870989;  
709 PubMed Central PMCID: PMCPMC4529360.

- 710 15. Hurst J, Hoffmann M, Pace M, Williams JP, Thornhill J, Hamlyn E, Meyerowitz J,  
711 Willberg C, Koelsch KK, Robinson N, Brown H, Fisher M, Kinloch S, Cooper DA,  
712 Schechter M, Tambussi G, Fidler S, Babiker A, Weber J, Kelleher AD, Phillips RE,  
713 Frater J. Immunological biomarkers predict HIV-1 viral rebound after treatment  
714 interruption. *Nat Commun.* 2015;6:8495. Epub 2015/10/10. doi: 10.1038/ncomms9495.  
715 PubMed PMID: 26449164; PubMed Central PMCID: PMC4633715.
- 716 16. Li JZ, Etemad B, Ahmed H, Aga E, Bosch RJ, Mellors JW, Kuritzkes DR,  
717 Lederman MM, Para M, Gandhi RT. The size of the expressed HIV reservoir predicts  
718 timing of viral rebound after treatment interruption. *AIDS.* 2016;30(3):343-53. Epub  
719 2015/11/21. doi: 10.1097/QAD.0000000000000953. PubMed PMID: 26588174;  
720 PubMed Central PMCID: PMC4840470.
- 721 17. Assoumou L, Weiss L, Piketty C, Burgard M, Melard A, Girard PM, Rouzioux C,  
722 Costagliola D, group ASs. A low HIV-DNA level in peripheral blood mononuclear cells at  
723 antiretroviral treatment interruption predicts a higher probability of maintaining viral  
724 control. *AIDS.* 2015;29(15):2003-7. doi: 10.1097/QAD.0000000000000734. PubMed  
725 PMID: 26355572.
- 726 18. Williams JP, Hurst J, Stohr W, Robinson N, Brown H, Fisher M, Kinloch S,  
727 Cooper D, Schechter M, Tambussi G, Fidler S, Carrington M, Babiker A, Weber J,  
728 Koelsch KK, Kelleher AD, Phillips RE, Frater J, Investigators SP. HIV-1 DNA predicts  
729 disease progression and post-treatment virological control. *eLife.* 2014;3:e03821. doi:  
730 10.7554/eLife.03821. PubMed PMID: 25217531; PubMed Central PMCID:  
731 PMC4199415.



- 732 19. Kumar N, Chahroudi A, Silvestri G. Animal models to achieve an HIV cure. *Curr*  
733 *Opin HIV AIDS*. 2016;11(4):432-41. doi: 10.1097/COH.0000000000000290. PubMed  
734 PMID: 27152962; PubMed Central PMCID: PMC4922307.
- 735 20. Van Rompay KK, Abel K, Lawson JR, Singh RP, Schmidt KA, Evans T, Earl P,  
736 Harvey D, Franchini G, Tartaglia J, Montefiori D, Hattangadi S, Moss B, Marthas ML.  
737 Attenuated poxvirus-based simian immunodeficiency virus (SIV) vaccines given in  
738 infancy partially protect infant and juvenile macaques against repeated oral challenge  
739 with virulent SIV. *J Acquir Immune Defic Syndr*. 2005;38(2):124-34. Epub 2005/01/27.  
740 PubMed PMID: 15671796.
- 741 21. Mavigner M, Habib J, Deleage C, Rosen E, Mattingly C, Bricker K, Kashuba A,  
742 Amblard F, Schinazi RF, Jean S, Cohen J, McGary C, Paiardini M, Wood MP, Sodora  
743 DL, Silvestri G, Estes J, Chahroudi A. Simian Immunodeficiency Virus Persistence in  
744 Cellular and Anatomic Reservoirs in Antiretroviral Therapy-Suppressed Infant Rhesus  
745 Macaques. *Journal of virology*. 2018;92(18). doi: 10.1128/JVI.00562-18. PubMed PMID:  
746 29997216; PubMed Central PMCID: PMC6146711.
- 747 22. Li H, Wang S, Kong R, Ding W, Lee FH, Parker Z, Kim E, Learn GH, Hahn P,  
748 Policicchio B, Brocca-Cofano E, Deleage C, Hao X, Chuang GY, Gorman J, Gardner M,  
749 Lewis MG, Hatzioannou T, Santra S, Apetrei C, Pandrea I, Alam SM, Liao HX, Shen X,  
750 Tomaras GD, Farzan M, Chertova E, Keele BF, Estes JD, Lifson JD, Doms RW,  
751 Montefiori DC, Haynes BF, Sodroski JG, Kwong PD, Hahn BH, Shaw GM. Envelope  
752 residue 375 substitutions in simian-human immunodeficiency viruses enhance CD4  
753 binding and replication in rhesus macaques. *Proceedings of the National Academy of*  
754 *Sciences of the United States of America*. 2016;113(24):E3413-22. doi:

755 10.1073/pnas.1606636113. PubMed PMID: 27247400; PubMed Central PMCID:

756 PMC4914158.

757 23. Bar KJ, Coronado E, Hensley-McBain R, O'Connor MA, Osborn J, Miller C, Gott  
758 TM, Wangari S, Iwayama N, Ahrens CY, Smedley J, Moats C, Lynch RM, Haddad EK,  
759 Haigwood NL, Fuller DH, Shaw GM, Klatt NR, Manuzak J. SHIV.CH505 infection of  
760 rhesus macaques results in persistent viral replication and induces intestinal  
761 immunopathology. *J Virol*, in press.

762 24. Zhang ZQ, Fu TM, Casimiro DR, Davies ME, Liang X, Schleif WA, Handt L,  
763 Tussey L, Chen M, Tang A, Wilson KA, Trigona WL, Freed DC, Tan CY, Horton M,  
764 Emini EA, Shiver JW. Mamu-A\*01 allele-mediated attenuation of disease progression in  
765 simian-human immunodeficiency virus infection. *Journal of virology*. 2002;76(24):12845-  
766 54. PubMed PMID: 12438610; PubMed Central PMCID: PMC136722.

767 25. Chen S, Lai C, Wu X, Lu Y, Han D, Guo W, Fu L, Andrieu JM, Lu W. Variability of  
768 bio-clinical parameters in Chinese-origin Rhesus macaques infected with simian  
769 immunodeficiency virus: a nonhuman primate AIDS model. *PloS one*.  
770 2011;6(8):e23177. doi: 10.1371/journal.pone.0023177. PubMed PMID: 21850259;  
771 PubMed Central PMCID: PMC3151272.

772 26. Nelson AN, Goswami R, Dennis M, Tu J, Mangan RJ, Saha PT, Cain DW, Curtis  
773 AD, Shen X, Shaw GM, Bar K, Hudgens M, Pollara J, De Paris K, Van Rompay KKA,  
774 Permar SR. SHIV.CH505-infected infant and adult rhesus macaques exhibit similar HIV  
775 Env-specific antibody kinetics, despite distinct T-follicular helper (Tfh) and germinal  
776 center B cell landscapes. *Journal of virology*. 2019. doi: 10.1128/JVI.00168-19. PubMed  
777 PMID: 31092583.

- 778 27. Zanchetta M, Anselmi A, Vendrame D, Rampon O, Giaquinto C, Mazza A,  
779 Accapezzato D, Barnaba V, De Rossi A. Early therapy in HIV-1-infected children: effect  
780 on HIV-1 dynamics and HIV-1-specific immune response. *Antiviral therapy*.  
781 2008;13(1):47-55. PubMed PMID: 18389898.
- 782 28. Roider JM, Muenchhoff M, Goulder PJ. Immune activation and paediatric HIV-1  
783 disease outcome. *Curr Opin HIV AIDS*. 2016;11(2):146-55. Epub 2015/12/19. doi:  
784 10.1097/COH.0000000000000231. PubMed PMID: 26679413; PubMed Central PMCID:  
785 PMCPMC4745133.
- 786 29. Eudailey JA, Dennis ML, Parker ME, Phillips BL, Huffman TN, Bay CP, Hudgens  
787 MG, Wiseman RW, Pollara JJ, Fouda GG, Ferrari G, Pickup DJ, Kozlowski PA, Van  
788 Rompay KKA, De Paris K, Permar SR. Maternal HIV-1 Env Vaccination for Systemic  
789 and Breast Milk Immunity To Prevent Oral SHIV Acquisition in Infant Macaques.  
790 *mSphere*. 2018;3(1). doi: 10.1128/mSphere.00505-17. PubMed PMID: 29359183;  
791 PubMed Central PMCID: PMC5760748.
- 792 30. Baan E, de Ronde A, Stax M, Sanders RW, Luchters S, Vyankandondera J,  
793 Lange JM, Pollakis G, Paxton WA. HIV-1 autologous antibody neutralization associates  
794 with mother to child transmission. *PloS one*. 2013;8(7):e69274. doi:  
795 10.1371/journal.pone.0069274. PubMed PMID: 23874931; PubMed Central PMCID:  
796 PMC3714266.
- 797 31. Mellors JW, Rinaldo CR, Jr., Gupta P, White RM, Todd JA, Kingsley LA.  
798 Prognosis in HIV-1 infection predicted by the quantity of virus in plasma. *Science*.  
799 1996;272(5265):1167-70. PubMed PMID: 8638160.

- 800 32. Milligan C, Richardson BA, John-Stewart G, Nduati R, Overbaugh J. Passively  
801 acquired antibody-dependent cellular cytotoxicity (ADCC) activity in HIV-infected infants  
802 is associated with reduced mortality. *Cell Host Microbe*. 2015;17(4):500-6. Epub  
803 2015/04/10. doi: 10.1016/j.chom.2015.03.002. PubMed PMID: 25856755; PubMed  
804 Central PMCID: PMCPMC4392343.
- 805 33. Frater J, Ewings F, Hurst J, Brown H, Robinson N, Fidler S, Babiker A, Weber J,  
806 Porter K, Phillips RE, Investigators ST. HIV-1-specific CD4(+) responses in primary HIV-  
807 1 infection predict disease progression. *AIDS*. 2014;28(5):699-708. doi:  
808 10.1097/QAD.000000000000130. PubMed PMID: 24549145.
- 809 34. van Rompay KK, Dailey PJ, Tarara RP, Canfield DR, Aguirre NL, Cherrington  
810 JM, Lamy PD, Bischofberger N, Pedersen NC, Marthas ML. Early short-term 9-[2-(R)-  
811 (phosphonomethoxy)propyl]adenine treatment favorably alters the subsequent disease  
812 course in simian immunodeficiency virus-infected newborn Rhesus macaques. *Journal*  
813 *of virology*. 1999;73(4):2947-55. Epub 1999/03/12. PubMed PMID: 10074144; PubMed  
814 Central PMCID: PMCPMC104054.
- 815 35. Borducchi EN, Liu J, Nkolola JP, Cadena AM, Yu WH, Fischinger S, Broge T,  
816 Abbink P, Mercado NB, Chandrashekar A, Jetton D, Peter L, McMahan K, Moseley ET,  
817 Bekerman E, Hesselgesser J, Li W, Lewis MG, Alter G, Geleziunas R, Barouch DH.  
818 Antibody and TLR7 agonist delay viral rebound in SHIV-infected monkeys. *Nature*.  
819 2018;563(7731):360-4. Epub 2018/10/05. doi: 10.1038/s41586-018-0600-6. PubMed  
820 PMID: 30283138; PubMed Central PMCID: PMCPMC6237629.
- 821 36. Buonaguro L, Tornesello ML, Buonaguro FM. Human immunodeficiency virus  
822 type 1 subtype distribution in the worldwide epidemic: pathogenetic and therapeutic

- 823 implications. *Journal of virology*. 2007;81(19):10209-19. doi: 10.1128/JVI.00872-07.  
824 PubMed PMID: 17634242; PubMed Central PMCID: PMC2045484.
- 825 37. Himes JE, Goswami R, Mangan RJ, Kumar A, Jeffries TL, Jr., Eudailey JA,  
826 Heimsath H, Nguyen QN, Pollara J, LaBranche C, Chen M, Vandergrift NA, Peacock  
827 JW, Schiro F, Midkiff C, Ferrari G, Montefiori DC, Hernandez XA, Aye PP, Permar SR.  
828 Polyclonal HIV envelope-specific breast milk antibodies limit founder SHIV acquisition  
829 and cell-associated virus loads in infant rhesus monkeys. *Mucosal immunology*. 2018.  
830 doi: 10.1038/s41385-018-0067-7. PubMed PMID: 30115994.
- 831 38. Humbert M, Rasmussen RA, Song R, Ong H, Sharma P, Chenine AL, Kramer  
832 VG, Siddappa NB, Xu W, Else JG, Novembre FJ, Strobert E, O'Neil SP, Ruprecht RM.  
833 SHIV-1157i and passaged progeny viruses encoding R5 HIV-1 clade C env cause AIDS  
834 in rhesus monkeys. *Retrovirology*. 2008;5:94. Epub 2008/10/22. doi: 10.1186/1742-  
835 4690-5-94. PubMed PMID: 18928523; PubMed Central PMCID: PMCPMC2576354.
- 836 39. Subbarao S, Otten RA, Ramos A, Kim C, Jackson E, Monsour M, Adams DR,  
837 Bashirian S, Johnson J, Soriano V, Rendon A, Hudgens MG, Butera S, Janssen R,  
838 Paxton L, Greenberg AE, Folks TM. Chemoprophylaxis with tenofovir disoproxil  
839 fumarate provided partial protection against infection with simian human  
840 immunodeficiency virus in macaques given multiple virus challenges. *The Journal of*  
841 *infectious diseases*. 2006;194(7):904-11. Epub 2006/09/09. doi: 10.1086/507306.  
842 PubMed PMID: 16960777.
- 843 40. Muenchhoff M, Prendergast AJ, Goulder PJ. Immunity to HIV in Early Life. *Front*  
844 *Immunol*. 2014;5:391. Epub 2014/08/28. doi: 10.3389/fimmu.2014.00391. PubMed  
845 PMID: 25161656; PubMed Central PMCID: PMCPMC4130105.

- 846 41. Fouda GG, Cunningham CK, McFarland EJ, Borkowsky W, Muresan P, Pollara  
847 J, Song LY, Liebl BE, Whitaker K, Shen X, Vandergrift NA, Overman RG, Yates NL,  
848 Moody MA, Fry C, Kim JH, Michael NL, Robb M, Pitisuttithum P, Kaewkungwal J,  
849 Nitayaphan S, Rerks-Ngarm S, Liao HX, Haynes BF, Montefiori DC, Ferrari G, Tomaras  
850 GD, Permar SR. Infant HIV type 1 gp120 vaccination elicits robust and durable anti-  
851 V1V2 immunoglobulin G responses and only rare envelope-specific immunoglobulin A  
852 responses. *The Journal of infectious diseases*. 2015;211(4):508-17. Epub 2014/08/30.  
853 doi: 10.1093/infdis/jiu444. PubMed PMID: 25170104; PubMed Central PMCID:  
854 PMCPMC4318918.
- 855 42. McManus M, Henderson J, Gautam A, Brody R, Weiss ER, Persaud D, Mick E,  
856 Luzuriaga K, Investigators P. Quantitative Human Immunodeficiency Virus (HIV)-1  
857 Antibodies Correlate With Plasma HIV-1 RNA and Cell-associated DNA Levels in  
858 Children on Antiretroviral Therapy. *Clin Infect Dis*. 2018. Epub 2019/01/23. doi:  
859 10.1093/cid/ciy753. PubMed PMID: 30668843.
- 860 43. Li JZ, Brumme ZL, Brumme CJ, Wang H, Spritzler J, Robertson MN, Lederman  
861 MM, Carrington M, Walker BD, Schooley RT, Kuritzkes DR, Team ACTGAS. Factors  
862 associated with viral rebound in HIV-1-infected individuals enrolled in a therapeutic HIV-  
863 1 gag vaccine trial. *The Journal of infectious diseases*. 2011;203(7):976-83. doi:  
864 10.1093/infdis/jiq143. PubMed PMID: 21402549; PubMed Central PMCID:  
865 PMC3068025.
- 866 44. Burbelo PD, Bayat A, Rhodes CS, Hoh R, Martin JN, Fromentin R, Chomont N,  
867 Hutter G, Kovacs JA, Deeks SG. HIV antibody characterization as a method to quantify  
868 reservoir size during curative interventions. *The Journal of infectious diseases*.

869 2014;209(10):1613-7. Epub 2013/11/30. doi: 10.1093/infdis/jit667. PubMed PMID:  
870 24286982; PubMed Central PMCID: PMCPMC3997576.

871 45. McLinden RJ, Paris RM, Polonis VR, Close NC, Su Z, Shikuma CM, Margolis  
872 DM, Kim JH. Association of HIV neutralizing antibody with lower viral load after  
873 treatment interruption in a prospective trial (A5170). *AIDS*. 2012;26(1):1-9. Epub  
874 2011/10/06. doi: 10.1097/QAD.0b013e32834d606e. PubMed PMID: 21971356.

875 46. Li JZ, Heisey A, Ahmed H, Wang H, Zheng L, Carrington M, Wrin T, Schooley  
876 RT, Lederman MM, Kuritzkes DR, Team AAS. Relationship of HIV reservoir  
877 characteristics with immune status and viral rebound kinetics in an HIV therapeutic  
878 vaccine study. *AIDS*. 2014;28(18):2649-57. Epub 2014/09/26. doi:  
879 10.1097/QAD.0000000000000478. PubMed PMID: 25254301; PubMed Central PMCID:  
880 PMCPMC4267919.

881 47. Dennis M, Eudailey J, Pollara J, McMillan AS, Cronin KD, Saha PT, Curtis AD,  
882 Hudgens MG, Fouda GG, Ferrari G, Alam M, Van Rompay KKA, De Paris K, Permar S,  
883 Shen X. Co-administration of CH31 broadly neutralizing antibody does not affect  
884 development of vaccine-induced anti-HIV-1 envelope antibody responses in infant  
885 Rhesus macaques. *Journal of virology*. 2018. Epub 2018/12/14. doi:  
886 10.1128/JVI.01783-18. PubMed PMID: 30541851.

887 48. Cline AN, Bess JW, Piatak M, Jr., Lifson JD. Highly sensitive SIV plasma viral  
888 load assay: practical considerations, realistic performance expectations, and application  
889 to reverse engineering of vaccines for AIDS. *Journal of medical primatology*. 2005;34(5-  
890 6):303-12. doi: 10.1111/j.1600-0684.2005.00128.x. PubMed PMID: 16128925.

- 891 49. Del Prete GQ, Smedley J, Macallister R, Jones GS, Li B, Hattersley J, Zheng J,  
892 Piatak M, Jr., Keele BF, Hesselgesser J, Geleziunas R, Lifson JD. Short  
893 Communication: Comparative Evaluation of Coformulated Injectable Combination  
894 Antiretroviral Therapy Regimens in Simian Immunodeficiency Virus-Infected Rhesus  
895 Macaques. *AIDS research and human retroviruses*. 2016;32(2):163-8. doi:  
896 10.1089/AID.2015.0130. PubMed PMID: 26150024; PubMed Central PMCID:  
897 PMC4761795.
- 898 50. Evans DT, Knapp LA, Jing P, Mitchen JL, Dykhuizen M, Montefiori DC, Pauza  
899 CD, Watkins DI. Rapid and slow progressors differ by a single MHC class I haplotype in  
900 a family of MHC-defined rhesus macaques infected with SIV. *Immunol Lett*. 1999;66(1-  
901 3):53-9. Epub 1999/04/15. PubMed PMID: 10203034.
- 902 51. Knapp LA, Lehmann E, Piekarczyk MS, Urvater JA, Watkins DI. A high frequency  
903 of Mamu-A\*01 in the rhesus macaque detected by polymerase chain reaction with  
904 sequence-specific primers and direct sequencing. *Tissue Antigens*. 1997;50(6):657-61.  
905 Epub 1998/02/11. PubMed PMID: 9458122.
- 906 52. Montefiori DC. Measuring HIV neutralization in a luciferase reporter gene assay.  
907 *Methods in molecular biology*. 2009;485:395-405. doi: 10.1007/978-1-59745-170-3\_26.  
908 PubMed PMID: 19020839.
- 909 53. Sarzotti-Kelsoe M, Bailer RT, Turk E, Lin CL, Bilaska M, Greene KM, Gao H, Todd  
910 CA, Ozaki DA, Seaman MS, Mascola JR, Montefiori DC. Optimization and validation of  
911 the TZM-bl assay for standardized assessments of neutralizing antibodies against HIV-  
912 1. *Journal of immunological methods*. 2014;409:131-46. doi: 10.1016/j.jim.2013.11.022.  
913 PubMed PMID: 24291345; PubMed Central PMCID: PMC4040342.



- 914 54. Pollara J, Hart L, Brewer F, Pickeral J, Packard BZ, Hoxie JA, Komoriya A,  
915 Ochsenbauer C, Kappes JC, Roederer M, Huang Y, Weinhold KJ, Tomaras GD,  
916 Haynes BF, Montefiori DC, Ferrari G. High-throughput quantitative analysis of HIV-1  
917 and SIV-specific ADCC-mediating antibody responses. *Cytometry Part A : the journal of*  
918 *the International Society for Analytical Cytology*. 2011;79(8):603-12. doi:  
919 10.1002/cyto.a.21084. PubMed PMID: 21735545; PubMed Central PMCID:  
920 PMC3692008.
- 921 55. Kumar A, Smith CEP, Giorgi EE, Eudailey J, Martinez DR, Yusim K, Douglas AO,  
922 Stamper L, McGuire E, LaBranche CC, Montefiori DC, Fouda GG, Gao F, Permar SR.  
923 Infant transmitted/founder HIV-1 viruses from peripartum transmission are neutralization  
924 resistant to paired maternal plasma. *PLoS pathogens*. 2018;14(4):e1006944. doi:  
925 10.1371/journal.ppat.1006944. PubMed PMID: 29672607; PubMed Central PMCID:  
926 PMC5908066.
- 927 56. Gouy M, Guindon S, Gascuel O. SeaView version 4: A multiplatform graphical  
928 user interface for sequence alignment and phylogenetic tree building. *Molecular biology*  
929 *and evolution*. 2010;27(2):221-4. doi: 10.1093/molbev/msp259. PubMed PMID:  
930 19854763.
- 931 57. Tamura K, Stecher G, Peterson D, Filipski A, Kumar S. MEGA6: Molecular  
932 Evolutionary Genetics Analysis version 6.0. *Molecular biology and evolution*.  
933 2013;30(12):2725-9. Epub 2013/10/18. doi: 10.1093/molbev/mst197. PubMed PMID:  
934 24132122; PubMed Central PMCID: PMCPMC3840312.
- 935 58. Curtis AD, 2nd, Walter KA, Nabi R, Jensen K, Dwivedi A, Pollara J, Ferrari G,  
936 Van Rompay KKA, Amara RR, Kozlowski PA, De Paris K. Oral Coadministration of an

937 Intramuscular DNA/Modified Vaccinia Ankara Vaccine for Simian Immunodeficiency  
938 Virus Is Associated with Better Control of Infection in Orally Exposed Infant Macaques.  
939 AIDS research and human retroviruses. 2018. doi: 10.1089/AID.2018.0180. PubMed  
940 PMID: 30303405.

941 59. Amedee AM, Phillips B, Jensen K, Robichaux S, Lacour N, Burke M, Piatak M,  
942 Jr., Lifson JD, Kozlowski PA, Van Rompay KKA, De Paris K. Early Sites of Virus  
943 Replication After Oral SIVmac251 Infection of Infant Macaques: Implications for  
944 Pathogenesis. AIDS research and human retroviruses. 2018;34(3):286-99. doi:  
945 10.1089/AID.2017.0169. PubMed PMID: 29237287; PubMed Central PMCID:  
946 PMC5863100.

947 60. R: A language and environment for statistical computing. R Foundation for  
948 Statistical Computing, Vienna, Austria. R Core Team 2018.

949  
950  
951  
952  
953  
954  
955  
956  
957  
958  
959

960 **FIGURE LEGENDS.**

961

962 **Figure 1: SHIV.CH505.375H.dCT replication kinetics prior to and following ATI in**  
963 **infant RMs. (A)** Schematic representation of SHIV.CH505.375H.dCT infection (0-12  
964 weeks), ART (12-20 weeks) and ATI (20-28 weeks) in infant RMs. Blood samples were  
965 collected at weekly intervals throughout the study and peripheral lymph nodes (LN)  
966 were collected at 12 w.p.i and on ART (20 w.p.i) **(B)** Kinetics of plasma SHIV RNA over  
967 28 weeks was measured by qRT-PCR. **(C)** Peripheral lymph nodes from RMs on ART  
968 (20 w.p.i) were collected, and naïve, memory and Tfh CD4+ T cell-associated SHIV  
969 DNA was estimated by qPCR. **(D)** Cell-associated SHIV DNA (CA-SHIV DNA) and **(E)**  
970 cell-associated SHIV RNA (CA-SHIV RNA) per million CD4+ T cells in the peripheral  
971 blood was monitored by ddPCR in the infant RMs pre-ART (6 w.p.i) and on ART (18  
972 w.p.i). The sensitivity of the ddPCR assay was detection of 1 SHIV gag copy in 10,000  
973 CD4+ T cells. Therefore, only those animals that had  $\geq 10,000$  CD4+ T cells at a  
974 particular time point, were included in the analysis. Each symbol represents an  
975 individual animal. Yellow and grey boxes represent duration of ART (week 12-20) and  
976 duration of ATI (week 20-28), respectively. Medians are indicated as horizontal lines on  
977 the dot plots. Infants with plasma VL<15 copies/mL at 12 w.p.i has been represented  
978 with open symbols.

979

980 **Figure 2: Tissue-associated infectious viral loads upon ATI, in mononuclear cells**  
981 **isolated from PBMCs, lymphoid and GI tissues of orally infected infant RMs (A)**  
982 Tissue-associated infectious SHIV.CH505.375H.dCT titers measured through tissue

983 mononuclear cell coculture with Tzm-bl reporter cells. Reported titers represents the  
984 estimated minimum number of mononuclear cells per  $10^4$  mononuclear cells required to  
985 yield detectable infection of 50% Tzm-bl cells ( $CID_{50}$ ). **(B)** CD4+ T cell-associated  
986 proviral DNA and **(C)** CD4+ T cell-associated viral RNA loads at necropsy (28 w.p.i)  
987 reported as copy number/million CD4+ T cells in PBMCs, lymphoid and GI tissue  
988 mononuclear cells. Each symbol represents one individual animal. Medians are  
989 indicated as horizontal lines on the dot plots. Infants with plasma VL<15 copies/mL at  
990 12 w.p.i has been represented with open symbols. The sensitivity of the ddPCR assay  
991 was detection of 1 SHIV gag copy in 10,000 CD4+ T cells. Therefore, only those  
992 animals that had  $\geq 10,000$  CD4+ T cells at a particular time point, were included in the  
993 analysis. **(D)** Tonsil and colon sections from the SHIV.CH505.375H.dCT infected infant  
994 RM that demonstrated highest peak plasma VL post-rebound (20,000 vRNA copies/mL  
995 plasma). Tissue sections were stained with the nuclear marker DAPI (dark blue) to  
996 identify cells, and with antibodies specific for CD3 (green) and CD20 (red). Virally-  
997 infected cells were identified by *in-situ* hybridization (cyan). To better visualize the  
998 virally-infected cells, we magnified a specific region (white box) in each image. Each  
999 panel consists of a larger image with the overlay of all markers and 4 smaller side  
1000 panels of the same field for each individual channel. Arrow colors correspond to the  
1001 indicated marker. The large image has a scale bar in the lower right corner.

1002

1003 **Figure 3: SHIV.CH505.375H.dCT replication kinetics prior to and following ATI in**  
1004 **adult RMs. (A)** Schematic representation of SHIV.CH505.375H.dCT infection (0-12  
1005 weeks), ART (12-24 weeks) and ATI (24-32 weeks) in adult RMs. Blood samples were

1006 collected at weekly intervals throughout the study and peripheral lymph nodes (LN)  
1007 were collected at 12 w.p.i and after 8 weeks of ART (20 w.p.i) **(B)** Kinetics of plasma  
1008 SHIV RNA over 32 weeks was measured by qRT-PCR. **(C)** Peripheral lymph nodes  
1009 from macaques on ART (20 w.p.i) were collected, and naïve, memory and Tfh CD4+ T  
1010 cell-associated SHIV DNA was estimated by qPCR. **(D)** Cell-associated SHIV DNA (CA-  
1011 SHIV DNA) and **(E)** Cell-associated SHIV RNA (CA-SHIV RNA) from CD4+ T cells of  
1012 peripheral blood pre-ART (6 w.p.i for DNA and 12 w.p.i for RNA) and on-ART (18 w.p.i)  
1013 was monitored by ddPCR. The sensitivity of the ddPCR assay was detection of 1 SHIV  
1014 gag copy in 10,000 CD4+ T cells. Therefore, only those animals that had  $\geq 10,000$  CD4+  
1015 T cells at a particular time point, were included in the analysis. Each symbol represents  
1016 an individual animal. Yellow and grey boxes represent duration of ART (week 12-24)  
1017 and duration of ATI (week 24-32), respectively. Medians are indicated as horizontal  
1018 lines on the dot plots.

1019

1020 **Figure 4: Tissue-associated infectious virus load upon ATI, in mononuclear cells**  
1021 **isolated from PBMCs, lymphoid and GI tissues of adult RMs intravenously**  
1022 **infected with SHIV.CH505.375H.dCT (A)** Tissue-associated infectious  
1023 SHIV.CH505.375H.dCT titers measured through tissue mononuclear cell coculture with  
1024 Tzm-bl reporter cells. Reported titers represents the estimated minimum number of  
1025 mononuclear cells per  $10^4$  mononuclear cells required to yield detectable infection of  
1026 50% Tzm-bl cells ( $CID_{50}$ ). **(B)** CD4+ T cell-associated proviral DNA and **(C)** Viral RNA  
1027 loads reported as copy number/million CD4+ T cells in PBMCs, lymphoid and GI tissue  
1028 mononuclear cells. Each symbol represents one individual monkey at necropsy (week

1029 32 pi). Medians are indicated as horizontal lines on the dot plots. **(D)** Tonsil and colon  
1030 sections from the SHIV.CH505.375H.dCT infected adult RM (39950) that demonstrated  
1031 highest peak plasma VL post-rebound (13000 vRNA copies/mL plasma). Tissue  
1032 sections were stained with the nuclear marker DAPI (dark blue) to identify cells, and  
1033 with antibodies specific for CD3 (green) and CD20 (red). Virally-infected cells were  
1034 identified by *in-situ* hybridization (cyan). Each panel consists of a larger image with the  
1035 overlay of all markers and 4 smaller side panels of the same field for each individual  
1036 channel. Arrow colors correspond to the indicated marker. The large image has a scale  
1037 bar in the lower right corner.

1038

1039 **Figure 5. Phylogenetic tree analysis of the *env* gene sequences obtained from**  
1040 **pre-ART and post-ATI plasma of infant and adult RM demonstrating highest peak**  
1041 **plasma VL post-rebound.** Standard SGA techniques were used to analyze the *env*  
1042 gene from pre-ART and post-ATI samples of infants and adult RMs with highest peak  
1043 rebound plasma VL. Phylogenetic tree representing viral Env diversity in **(A)** infant  
1044 46352 and **(B)** adult 39950.

1045

1046 **Figure 6: Magnitude and kinetics of humoral responses to acute**  
1047 **SHIV.CH505.375H.dCT infection, during ART and ATI in RMs.** Plasma from infant  
1048 and adult rhesus macaques were analyzed for **(A)** HIV CH505 gp120 IgG response **(B)**  
1049 blocking of soluble CD4-gp120 interactions **(C)** tier-1 neutralization response against  
1050 MW965 **(D)** neutralization response against CH505 T/F, and **(E)** ADCC titer against  
1051 CH505 gp120-coated target cells. Red symbols represent infant RMs and blue symbols

1052 represent adult RMs. Each symbol represents an individual macaque. Yellow and grey  
1053 boxes represent duration of ART and duration of ATI in the RMs, respectively. Infants  
1054 with plasma VL<15 copies/mL at 12 w.p.i has been represented with open symbols. P  
1055 values were calculated using Wilcoxon signed rank test.

1056

1057 **Figure 7: CD4+ T cell activation and plasma inflammatory responses in**

1058 **SHIV.CH505.375H.dCT infected infant and adult RMs.** Absolute counts per ml blood  
1059 of **(A)** activated (CD69+, HLADR+) CD4+ T cells and **(B)** proliferating (Ki67+ CD4+) and  
1060 exhausted (PD-1+) CD4+ T cells. Red symbol represents infant RMs and blue symbols  
1061 represents adult RMs. Each symbol represents one animal. Yellow and grey boxes  
1062 represent duration of ART and duration of ATI, respectively. **(C)** Plasma from infected  
1063 infant and adult RMs were analyzed by multiplexed luminex assay for expression of  
1064 cytokines before ART (week 12) and 8 weeks on ART (week 20). Heat map represents  
1065 fold change of each analyte over pre-infection plasma levels. Infants with plasma VL<15  
1066 copies/mL at 12 w.p.i has been represented with open symbols. P values were  
1067 calculated using Wilcoxon signed rank test.

1068

1069

1070

1071

1072

1073

1074

1075 **SUPPLEMENTAL MATERIALS.**

1076

1077 **Figure S1: Proportions of CD4+ T cells in blood, lymph nodes and gut-associated**  
1078 **tissues of SHIV.CH505.375H.dCT infected infants and adult RMs. (A)** Frequencies  
1079 of PBMC-CD4+ T cells in SHIV.CH505.375H.dCT infected infant and adult RMs through  
1080 28 w.p.i and 32 w.p.i, respectively. **(B)** Proportions of CD4+ T cells of CD3+ T cells in  
1081 PBMC, oral and gut-associated lymphoid tissues, and spleen of infected infant RMs at  
1082 necropsy (28 w.p.i) and adult RMs at necropsy (32 w.p.i). Red symbols represent  
1083 infants and blue symbols represent adults. Each symbol represents one animal. Yellow  
1084 and grey boxes represent duration of ART and duration of ATI, respectively. Infants with  
1085 plasma VL<15 copies/mL at 12 w.p.i has been represented with open symbols.

1086

1087 **Figure S2: Tissue-associated infectious viral levels in RMs infected with**  
1088 **SHIV.CH505.375H.dCT.** Mononuclear cells isolated from tissues of **(A)** infant and **(B)**  
1089 adult RMs infected with SHIV.CH505.375H.dCT were serially diluted and co-cultured  
1090 with Tzm-bl reporter cells for 72 hrs, followed by luminescent detection of tissue-  
1091 associated SHIV infectivity in relative luminescence units (RLU). The RLU limit of  
1092 detection for positive tissue-associated SHIV infection (dashed line) was defined as 2.5  
1093 times the mean maximum RLU elicited from Tzm-bl cells (n=10 independent assays) in  
1094 the co-culture assay.

1095

1096 **Figure S3: Specificity of Env-IgG responses before- and on-ART in**  
1097 **SHIV.CH505.375H.dCT infected RMs.** Plasma IgG specificity against a panel of HIV



1098 Env linear and conformational epitopes pre ART (12 w.p.i) and on ART (20 w.p.i) in  
1099 SHIV.C.CH505 infected **(A)** infant and **(B)** adult RMs. Heat maps represents mean  
1100 fluorescence intensity (MFI) of IgG binding to each epitope.

1101

1102 **Figure S4: Flow cytometry gating strategy for T cell phenotyping and sorting.** For  
1103 T cell phenotyping, CD4+ T cells and CD8+ T cells were positively selected from the  
1104 PBMCs by sequential selection of forward and side scatter singlets, lymphocytes, viable  
1105 cells, CD16-CD14- (Monocytes/macrophages) cells and CD3+ cells (T cells). CD4+ T  
1106 cells were further analyzed for expression of activation markers HLA-DR and CD69;  
1107 proliferation marker Ki67 and exhaustion markers PD-1. For sorting CD4+ T cells, CD4+  
1108 T cells were positively selected from lymph node-associated mononuclear cells by  
1109 sequential selection of forward scatter singlets, lymphocytes and CD3+ T cells. Tfh cells  
1110 (CXCR5<sup>hi</sup> PD-1<sup>hi</sup>), naïve CD4+ T cells (CD95- CD28+ CD45RA+ CCR7+) and memory  
1111 CD4+ T cells (CD95+ CD28+ CD45RA- CCR7+) were sorted from CD4+ T cells.

1112

1113 **Table S1.** MHC class I genotype of infant and adult RMs.

1114

1115 **Table S2.** Antibodies used for T cell phenotyping, CD4+ T cell sorting and *in situ*  
1116 hybridization (ISH).

1117

1118 **Table S3.** Primers and probes used for the assays.

1119

**Table 1.** SHIV.CH505.375H.dCT infected rhesus macaques, weeks of challenges to infection, age at infection, sex, time to viral control post-ART and time to viral rebound post-ATI.

| Animal Age | Animal ID | Challenges to infection (wk) | Age at infection <sup>a</sup> | Sex <sup>b</sup> | Pre- ART control <sup>c,e</sup> | Time to viral control post-ART (wk) <sup>d,f</sup> | Viral rebound post ATI <sup>c,g</sup> | Time to viral rebound post-ATI (wk) <sup>d</sup> | Post- rebound control <sup>c,d,h</sup> |
|------------|-----------|------------------------------|-------------------------------|------------------|---------------------------------|----------------------------------------------------|---------------------------------------|--------------------------------------------------|----------------------------------------|
| Infant     | 46357     | 1                            | 5                             | M                | N                               | 1                                                  | Y                                     | 3                                                | N                                      |
|            | 46346     | 2                            | 9                             | F                | N                               | 1                                                  | Y                                     | 6                                                | Y                                      |
|            | 46352     | 2                            | 9                             | F                | N                               | 4                                                  | Y                                     | 1                                                | N                                      |
|            | 46359     | 3                            | 10                            | F                | Y                               | N/A                                                | N                                     | N/A                                              | N/A                                    |
|            | 46367     | 7                            | 14                            | M                | Y                               | N/A                                                | Y                                     | 4                                                | Y                                      |
|            | 46380     | 4                            | 11                            | F                | N                               | 1                                                  | Y                                     | 3                                                | N                                      |
| Adult      | 39472     | 1                            | 8                             | F                | N                               | 1                                                  | N                                     | N/A                                              | N/A                                    |
|            | 43068     | 1                            | 5                             | F                | N                               | 1                                                  | N                                     | N/A                                              | N/A                                    |
|            | 43268     | 1                            | 4                             | F                | N                               | 1                                                  | Y                                     | 3                                                | N                                      |
|            | 42368     | 1                            | 5                             | F                | N                               | 1                                                  | Y                                     | 3                                                | Y                                      |
|            | 39950     | 1                            | 8                             | F                | N                               | 4                                                  | Y                                     | 2                                                | N                                      |
|            | 38200     | 1                            | 10                            | F                | N                               | 1                                                  | N                                     | N/A                                              | N/A                                    |

<sup>a</sup>Weeks in infants; years in adults

<sup>b</sup>M, male; F, female

<sup>c</sup>N, No; Y, Yes

<sup>d</sup>N/A, Not applicable

<sup>e</sup>Pre ART control: plasma VL≤15 copies/mL at ART start (12 w.p.i)

<sup>f</sup>Viral control post ART: plasma VL≤15 copies/mL after ART start

<sup>g</sup>Viral rebound: Plasma VL≥10X detection limit of the assay (150 copies of vRNA/mL plasma) post ART discontinuation

<sup>h</sup>Post-rebound control: Plasma VL≤15 copies/mL after 8 weeks post-ATI, in monkeys showing viral rebound.

**Table 2.** Virologic and immunologic correlates of time to viral rebound, with adjustment for age.

| Variables                                                       | HR (95% CI)       | Unadjusted p value | Adjusted p value |
|-----------------------------------------------------------------|-------------------|--------------------|------------------|
| <b>Pre-selected Variables</b>                                   |                   |                    |                  |
| Plasma VL at ART start <sup>a</sup>                             | 2.2 (1.24-3.95)   | <b>0.008</b>       | NA               |
| ADCC antibody titer on ART <sup>a</sup>                         | 1.9 (1.05-3.45)   | <b>0.034</b>       | NA               |
| CD4+ CD69+ T cells on ART <sup>b</sup>                          | 0.82 (0.26-2.56)  | 0.727              | NA               |
| CH505 T/F neutralizing antibody titer at ART start <sup>a</sup> | 2.1 (0.82-5.57)   | 0.119              | NA               |
| <b>Exploratory Variables</b>                                    |                   |                    |                  |
| <b>(a) Virologic and humoral responses</b>                      |                   |                    |                  |
| Peak plasma VL <sup>a</sup>                                     | 1.39 (0.86-2.27)  | 0.182              | 0.364            |
| CH505 gp120-specific IgG pre ART <sup>a</sup>                   | 4.61 (1.38-15.42) | <b>0.0131</b>      | 0.066            |
| CH505 gp120-specific IgG on ART <sup>a</sup>                    | 6.06 (1.33-27.54) | <b>0.0197</b>      | 0.066            |
| Tier-1 MW965 neutralizing antibody pre-ART <sup>a</sup>         | 4.12 (1.42-11.96) | <b>0.00926</b>     | 0.066            |
| sCD4 blocking antibodies pre-ART <sup>c</sup>                   | 1.07 (1-1.13)     | <b>0.0402</b>      | 0.1              |
| <b>(b) CD4+ T cell phenotypes and inflammatory responses</b>    |                   |                    |                  |
| CD4+ T pre-ART <sup>b</sup>                                     | 0.97 (0.86-1.1)   | 0.66               | 0.81             |
| CD4+ T on ART <sup>b</sup>                                      | 0.99 (0.9-1.09)   | 0.77               | 0.82             |
| HLADR+ CD4+ T on ART <sup>b</sup>                               | 1 (1-1)           | 0.71               | 0.81             |
| Ki67+ CD4+ T on ART <sup>b</sup>                                | 1 (0.98-1.05)     | 0.4                | 0.8              |
| PD-1+ CD4+ T on ART <sup>b</sup>                                | 1 (1-1)           | 0.32               | 0.8              |
| G-CSF on ART <sup>b</sup>                                       | 1.1 (0.91-1.28)   | 0.36               | 0.8              |
| IL-12 on ART <sup>d</sup>                                       | 1.1 (0.96-1.36)   | 0.13               | 0.8              |
| IL-15 on ART <sup>d</sup>                                       | 0.77 (0.4-1.5)    | 0.45               | 0.8              |
| IL-18 on ART <sup>d</sup>                                       | 0.97 (0.93-1.01)  | 0.15               | 0.8              |
| IL-1RA on ART <sup>d</sup>                                      | 1 (0.99-1.01)     | 0.71               | 0.81             |
| IL-8 on ART <sup>d</sup>                                        | 1 (1-1)           | 0.97               | 0.97             |
| MCP-1 on ART <sup>d</sup>                                       | 1 (0.99-1.02)     | 0.34               | 0.8              |
| MIP1a on ART <sup>d</sup>                                       | 0.68 (0.3-1.57)   | 0.37               | 0.8              |
| TNFa on ART <sup>d</sup>                                        | 0.91 (0.79-1.04)  | 0.17               | 0.8              |
| VEGF on ART <sup>d</sup>                                        | 0.97 (0.86-1.1)   | 0.64               | 0.81             |
| SCD40L on ART <sup>d</sup>                                      | 1 (1-1)           | 0.7                | 0.81             |

Values expressed as <sup>a</sup>Log<sub>10</sub>; <sup>b</sup>Absolute counts/nL of blood; <sup>c</sup>Percentages; <sup>d</sup>Concentrations

HR: Hazard ratio; CI: Confidence Interval; NA: Not applicable since multiple adjustment was not performed on pre-selected parameters.

**Table 3.** Virologic and immunologic correlates of time to viral rebound in each age group.

| Variables                                                       | Infant        |                    |                  | Adult         |                    |                  |
|-----------------------------------------------------------------|---------------|--------------------|------------------|---------------|--------------------|------------------|
|                                                                 | Kendall's Tau | Unadjusted p value | Adjusted p value | Kendall's Tau | Unadjusted p value | Adjusted p value |
| <b>Pre-selected Variables</b>                                   |               |                    |                  |               |                    |                  |
| Plasma VL at ART start <sup>a</sup>                             | -0.786        | <b>0.032</b>       | NA               | -0.886        | <b>0.022</b>       | NA               |
| ADCC antibody titer on ART <sup>a</sup>                         | -0.414        | 0.251              | NA               | -0.701        | 0.064              | NA               |
| CD4+ CD69+ T cells on ART <sup>b</sup>                          | 0.276         | 0.444              | NA               | -0.078        | 0.837              | NA               |
| CH505 T/F neutralizing antibody titer at ART start <sup>a</sup> | -0.54         | 0.152              | NA               | -0.322        | 0.404              | NA               |
| <b>Exploratory Variables</b>                                    |               |                    |                  |               |                    |                  |
| <b>(a) Virologic and humoral responses</b>                      |               |                    |                  |               |                    |                  |
| Peak plasma VL <sup>a</sup>                                     | 0             | 1                  | 1                | -0.856        | <b>0.024</b>       | <b>0.04</b>      |
| CH505 gp120-specific IgG pre ART <sup>a</sup>                   | -0.69         | <b>0.056</b>       | 0.14             | -0.856        | <b>0.024</b>       | <b>0.04</b>      |
| CH505 gp120-specific IgG on ART <sup>a</sup>                    | -0.69         | <b>0.056</b>       | 0.14             | -0.701        | 0.064              | 0.08             |
| Tier-1 MW965 neutralizing antibody pre-ART <sup>a</sup>         | -0.552        | 0.126              | 0.158            | -0.856        | <b>0.024</b>       | <b>0.04</b>      |
| sCD4 blocking antibodies pre-ART <sup>c</sup>                   | -0.552        | 0.126              | 0.158            | -0.545        | 0.15               | 0.15             |
| <b>(b) CD4+ T cell phenotypes and inflammatory responses</b>    |               |                    |                  |               |                    |                  |
| CD4+ T pre-ART <sup>b</sup>                                     | 0.138         | 0.702              | 0.936            | 0.078         | 0.837              | 0.837            |
| CD4+ T on ART <sup>b</sup>                                      | 0             | 1                  | 1                | 0.234         | 0.537              | 0.781            |
| HLADR+ CD4+ T on ART <sup>b</sup>                               | 0.276         | 0.444              | 0.936            | -0.078        | 0.837              | 0.837            |
| Ki67+ CD4+ T on ART <sup>b</sup>                                | -0.276        | 0.444              | 0.936            | 0.078         | 0.837              | 0.837            |
| PD-1+ CD4+ T on ART <sup>b</sup>                                | 0.138         | 0.702              | 0.936            | 0.545         | 0.15               | 0.781            |
| G-CSF on ART <sup>b</sup>                                       | 0.357         | 0.33               | 0.936            | -0.418        | 0.289              | 0.781            |
| IL-12 on ART <sup>d</sup>                                       | -0.357        | 0.33               | 0.936            | -0.261        | 0.511              | 0.781            |
| IL-15 on ART <sup>d</sup>                                       | -0.138        | 0.702              | 0.936            | 0.322         | 0.404              | 0.781            |
| IL-18 on ART <sup>d</sup>                                       | 0.552         | 0.126              | 0.936            | 0.405         | 0.343              | 0.781            |
| IL-1RA on ART <sup>d</sup>                                      | 0.138         | 0.702              | 0.936            | 0.389         | 0.304              | 0.781            |
| IL-8 on ART <sup>d</sup>                                        | 0.138         | 0.702              | 0.936            | 0.078         | 0.837              | 0.837            |
| MCP-1 on ART <sup>d</sup>                                       | -0.414        | 0.251              | 0.936            | -0.234        | 0.537              | 0.781            |
| MIP1a on ART <sup>d</sup>                                       | 0.077         | 0.838              | 0.967            | 0.405         | 0.343              | 0.781            |
| TNFa on ART <sup>d</sup>                                        | 0.357         | 0.33               | 0.936            | 0.234         | 0.537              | 0.781            |
| VEGF on ART <sup>d</sup>                                        | -0.071        | 0.846              | 0.967            | 0.087         | 0.827              | 0.837            |
| SCD40L on ART <sup>d</sup>                                      | 0             | 1                  | 1                | -0.234        | 0.537              | 0.781            |

Values expressed as <sup>a</sup>Log<sub>10</sub>; <sup>b</sup>Absolute counts/nL of blood; <sup>c</sup>Percentages; <sup>d</sup>Concentrations

NA: Not applicable since multiple adjustment was not performed on pre-selected parameters.

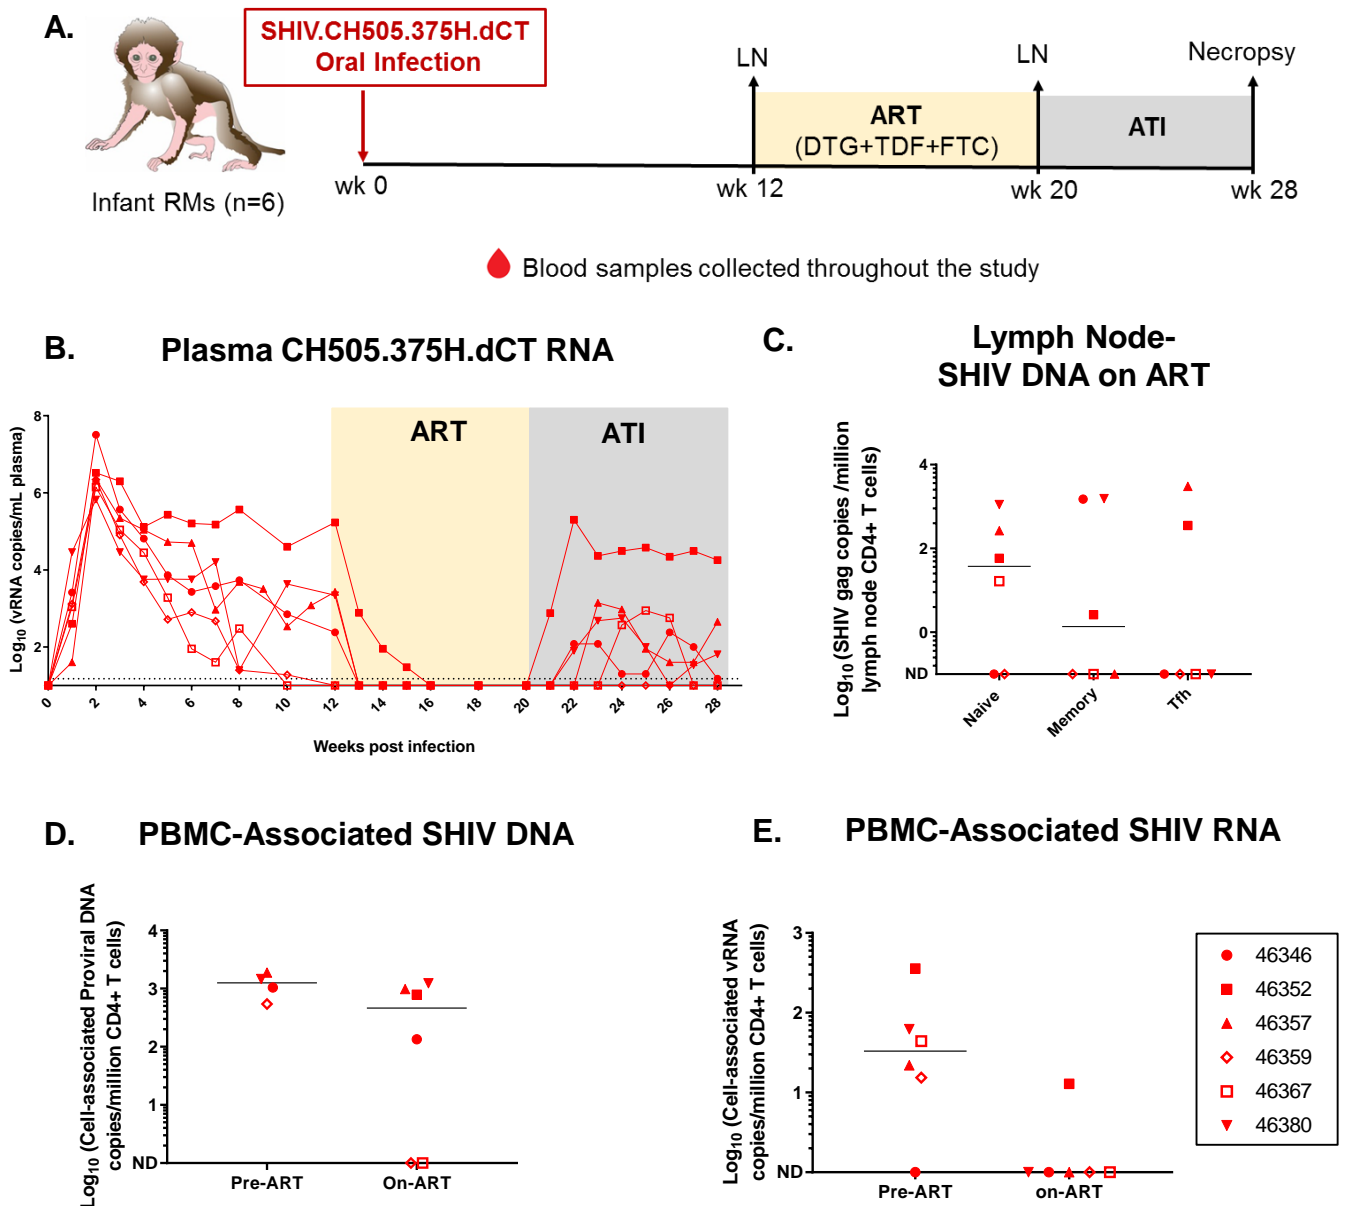

**Figure 1: SHIV.CH505.375H.dCT replication kinetics prior to and following ATI in infant RMs. (A)** Schematic representation of SHIV.CH505.375H.dCT infection (0-12 weeks), ART (12-20 weeks) and ATI (20-28 weeks) in infant RMs. Blood samples were collected at weekly intervals throughout the study and peripheral lymph nodes (LN) were collected at 12 w.p.i and on ART (20 w.p.i) **(B)** Kinetics of plasma SHIV RNA over 28 weeks was measured by qRT-PCR. **(C)** Peripheral lymph nodes from RMs on ART (20 w.p.i) were collected, and naïve, memory and Tfh CD4+ T cell-associated SHIV DNA was

estimated by qPCR. **(D)** Cell-associated SHIV DNA (CA-SHIV DNA) and **(E)** cell-associated SHIV RNA (CA-SHIV RNA) per million CD4+ T cells in the peripheral blood was monitored by ddPCR in the infant RMs pre-ART (6 w.p.i) and on ART (18 w.p.i). The sensitivity of the ddPCR assay was detection of 1 SHIV gag copy in 10,000 CD4+ T cells. Therefore, only those animals that had  $\geq 10,000$  CD4+ T cells at a particular time point, were included in the analysis. Each symbol represents an individual animal. Yellow and grey boxes represent duration of ART (week 12-20) and duration of ATI (week 20-28), respectively. Medians are indicated as horizontal lines on the dot plots. Infants with plasma VL < 15 copies/mL at 12 w.p.i has been represented with open symbols.

### A. Tissue- associated infectious viral load 8 weeks post- ATI

|                    |                                                    | 46357 | 46346 | 46352 | 46359 | 46367 | 46380 |
|--------------------|----------------------------------------------------|-------|-------|-------|-------|-------|-------|
| Plasma             | SHIV RNA copies/ml                                 | 450   | <15   | 18000 | <15   | <15   | 65    |
| Spleen             | 50% Cellular Infectious Dose (CID <sub>50</sub> )* | >400  | >400  | 2.0   | >400  | >400  | >400  |
| Mesenteric LN      |                                                    | 30.8  |       | 3.5   | >400  | >400  | 400   |
| Submandibular LN   |                                                    | 10    | >400  | 0.3   | 200   | >400  | 11.7  |
| Retropharyngeal LN |                                                    |       |       |       | 200   |       | 25    |
| PBMC               |                                                    |       |       |       | >400  | >400  | >400  |
| Ileum              |                                                    |       | >400  | 5.3   | 60.5  |       | 190   |
|                    |                                                    |       |       |       |       |       |       |

**CID<sub>50</sub> Key**

|  |                      |
|--|----------------------|
|  | 0-19                 |
|  | 20-49                |
|  | 50-99                |
|  | 100-200              |
|  | >200                 |
|  | Tissue not available |

\*CID<sub>50</sub>: Number of mononuclear cells/10<sup>4</sup> mononuclear cells needed to yield detectable infection of 50% Tzm-bl cells.

### B. Tissue- Associated SHIV DNA 8 weeks post-ATI

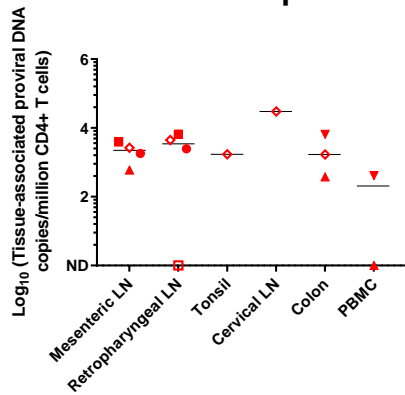

### C. Tissue- Associated SHIV RNA 8 weeks post-ATI

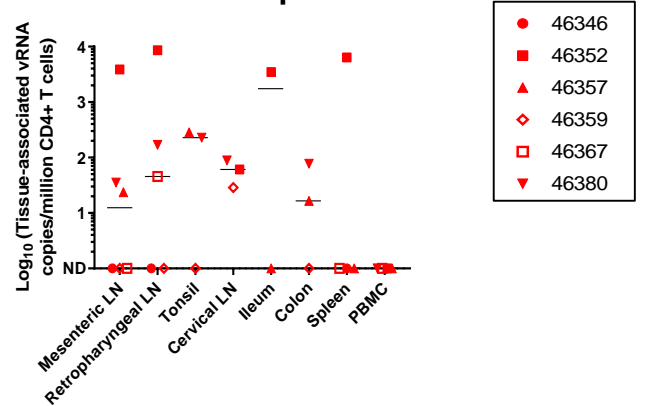

### D. 46352-Tonsil

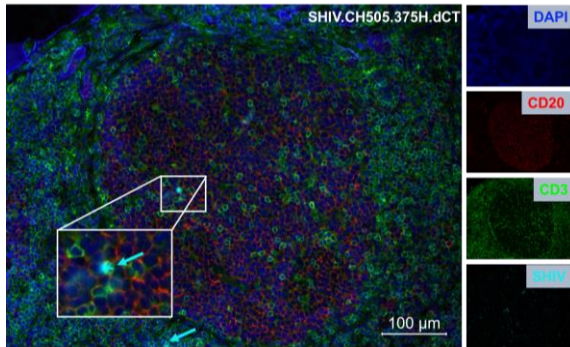

### 46352-Colon Lymphoid Aggregate

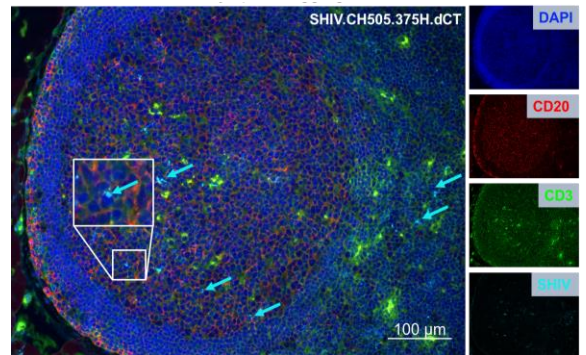

**Figure 2: Tissue-associated infectious viral loads upon ATI, in mononuclear cells isolated from PBMCs, lymphoid and GI tissues of orally infected infant RMs (A) Tissue-associated infectious SHIV.CH505.375H.dCT titers measured through tissue mononuclear cell coculture with Tzm-bl reporter cells. Reported titers represents the estimated minimum number of mononuclear cells per 10<sup>4</sup> mononuclear cells required to yield detectable infection of 50% Tzm-bl cells (CID<sub>50</sub>). (B) CD4+ T cell-associated proviral DNA and (C) CD4+ T cell-associated viral RNA loads at**

necropsy (28 w.p.i) reported as copy number/million CD4+ T cells in PBMCs, lymphoid and GI tissue mononuclear cells. Each symbol represents one individual animal. Medians are indicated as horizontal lines on the dot plots. Infants with plasma VL<15 copies/mL at 12 w.p.i has been represented with open symbols. The sensitivity of the ddPCR assay was detection of 1 SHIV gag copy in 10,000 CD4+ T cells. Therefore, only those animals that had  $\geq 10,000$  CD4+ T cells at a particular time point, were included in the analysis. **(D)** Tonsil and colon sections from the SHIV.CH505.375H.dCT infected infant RM that demonstrated highest peak plasma VL post-rebound (20,000 vRNA copies/mL plasma). Tissue sections were stained with the nuclear marker DAPI (dark blue) to identify cells, and with antibodies specific for CD3 (green) and CD20 (red). Virally-infected cells were identified by *in-situ* hybridization (cyan). To better visualize the virally-infected cells, we magnified a specific region (white box) in each image. Each panel consists of a larger image with the overlay of all markers and 4 smaller side panels of the same field for each individual channel. Arrow colors correspond to the indicated marker. The large image has a scale bar in the lower right corner.



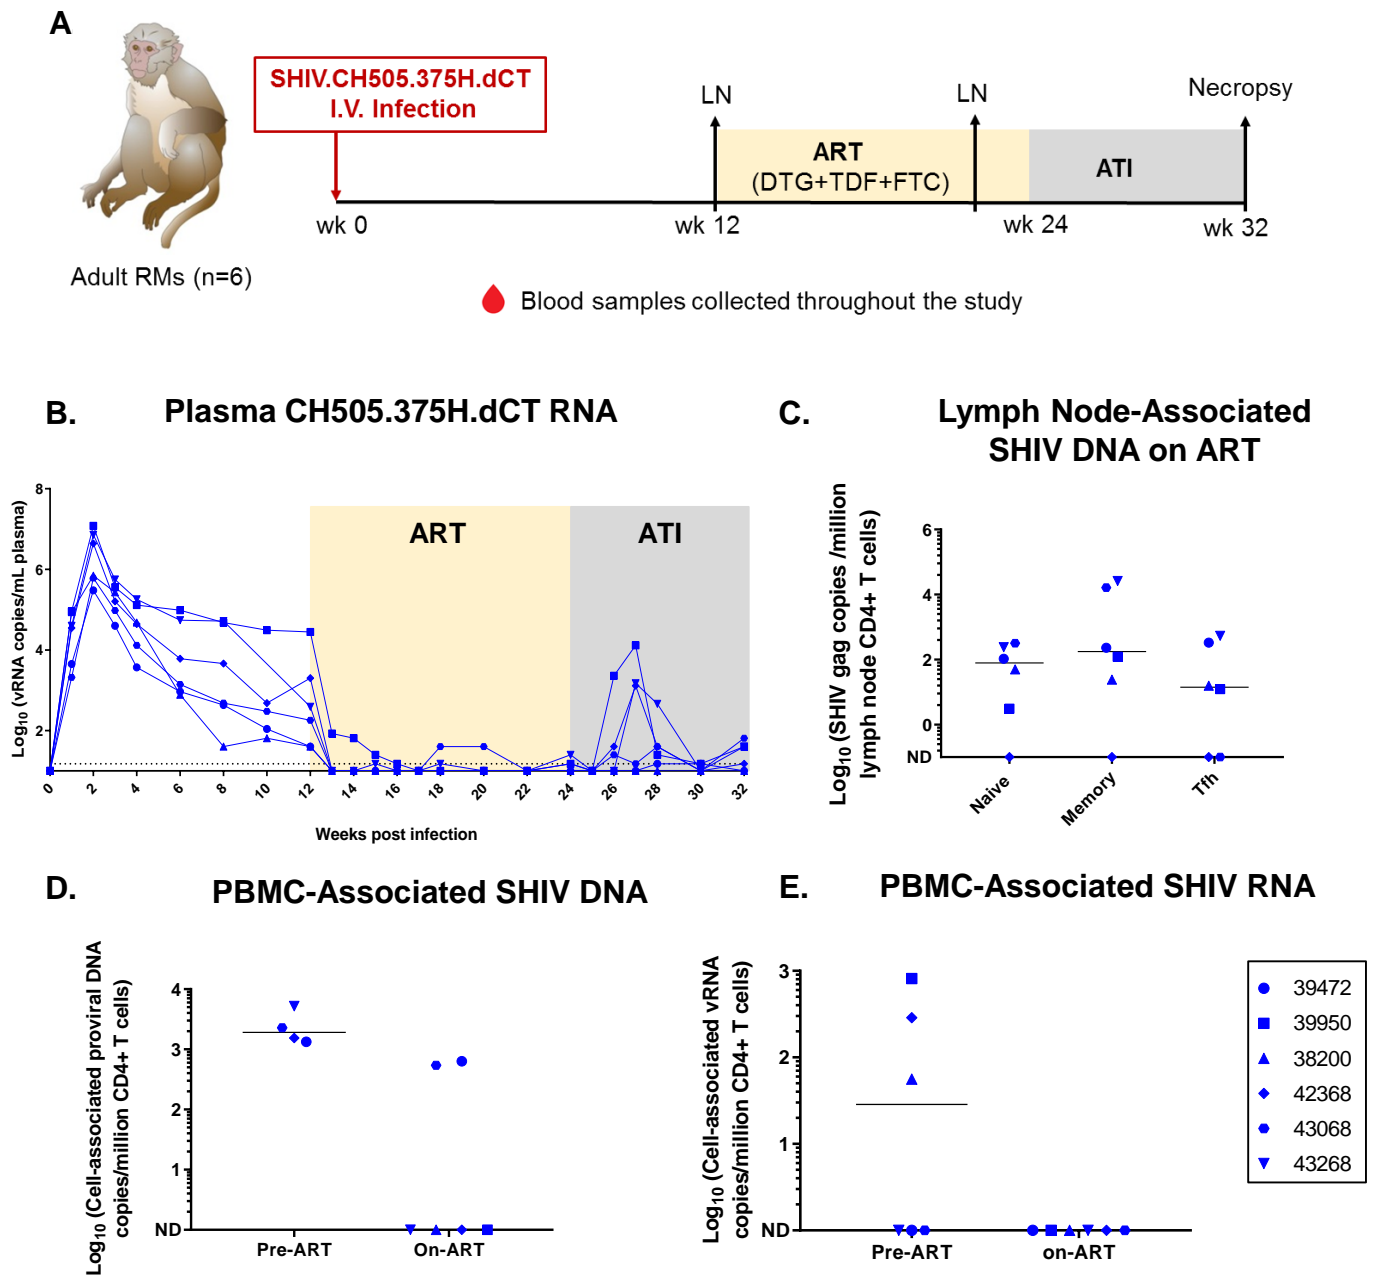

**Figure 3: SHIV.CH505.375H.dCT replication kinetics prior to and following ATI in adult RMs. (A)** Schematic representation of SHIV.CH505.375H.dCT infection (0-12 weeks), ART (12-24 weeks) and ATI (24-32 weeks) in adult RMs. Blood samples were collected at weekly intervals throughout the study and peripheral lymph nodes (LN) were collected at 12 w.p.i and after 8 weeks of ART (20 w.p.i) **(B)** Kinetics of plasma SHIV RNA over 32 weeks was measured by qRT-PCR.

**(C)** Peripheral lymph nodes from macaques on ART (20 w.p.i) were collected, and naïve, memory and Tfh CD4+ T cell-associated SHIV DNA was estimated by qPCR. **(D)** Cell-associated SHIV DNA (CA-SHIV DNA) and **(E)** Cell-associated SHIV RNA (CA-SHIV RNA) from CD4+ T cells of peripheral blood pre-ART (6 w.p.i for DNA and 12 w.p.i for RNA) and on-ART (18 w.p.i) was monitored by ddPCR. The sensitivity of the ddPCR assay was detection of 1 SHIV gag copy in 10,000 CD4+ T cells. Therefore, only those animals that had  $\geq 10,000$  CD4+ T cells at a particular time point, were included in the analysis. Each symbol represents an individual animal. Yellow and grey boxes represent duration of ART (week 12-24) and duration of ATI (week 24-32), respectively. Medians are indicated as horizontal lines on the dot plots.

## A. Tissue- associated infectious viral load 8 weeks post- ATI

|                    |                                                    | 39472 | 43068 | 43268 | 42368 | 39950 | 38200 |
|--------------------|----------------------------------------------------|-------|-------|-------|-------|-------|-------|
| Plasma             | SHIV RNA copies/ml                                 | <15   | 65    | 40    | <15   | 40    | <15   |
| Spleen             | 50% Cellular Infectious Dose (CID <sub>50</sub> )* | >400  | >400  | >400  | >400  | >400  | >400  |
| Mesenteric LN      |                                                    | >400  | 80    | 400   | >400  | 200   | >400  |
| Submandibular LN   |                                                    | 20    | 50    | 66.7  | 200   | 23.5  | >400  |
| Retropharyngeal LN |                                                    | 13    | 40    | 80    | 200   | 25    | 100   |
| PBMC               |                                                    | >400  | >400  | >400  | >400  | >400  | >400  |
| Ileum              |                                                    | 250   |       |       |       | >400  | >400  |

| CID <sub>50</sub> Key |                      |
|-----------------------|----------------------|
|                       | 0-19                 |
|                       | 20-49                |
|                       | 50-99                |
|                       | 100-200              |
|                       | >200                 |
|                       | Tissue not available |

\*CID<sub>50</sub>: Number of mononuclear cells/10<sup>4</sup> mononuclear cells needed to yield detectable infection of 50% Tzm-bl cells.

## B. Tissue- Associated SHIV DNA 8 weeks post-ATI

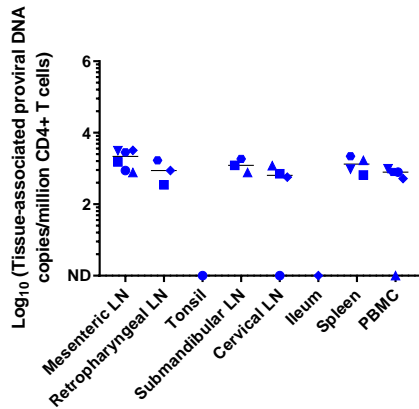

## C. Tissue- Associated SHIV RNA 8 weeks post-ATI

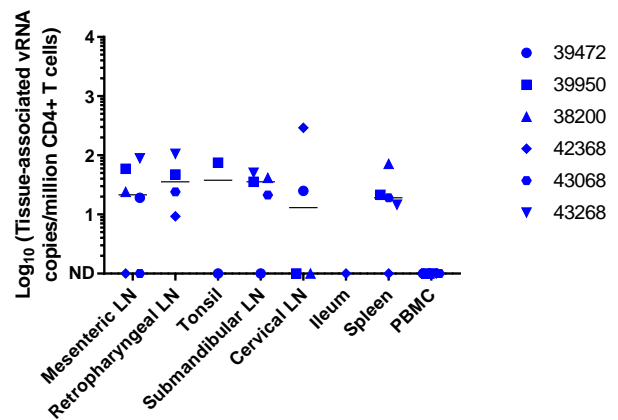

## D. 39950-Tonsil

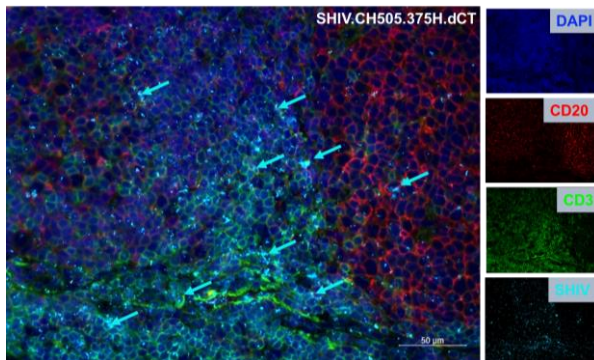

## 38200-Colon Lymphoid Aggregate

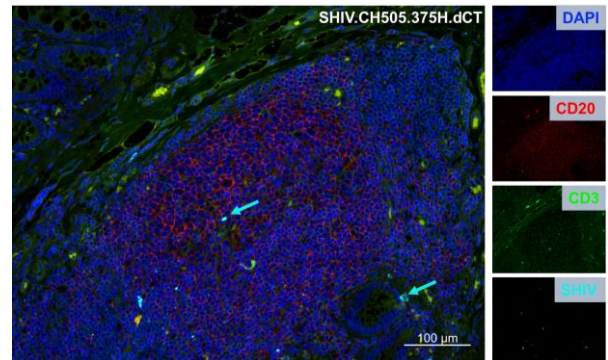

**Figure 4: Tissue-associated infectious virus load upon ATI, in mononuclear cells isolated from PBMCs, lymphoid and GI tissues of adult RMs intravenously infected with SHIV.CH505.375H.dCT (A)** Tissue-associated infectious SHIV.CH505.375H.dCT titers measured through tissue mononuclear cell coculture with Tzm-bl reporter cells. Reported titers represents the estimated minimum number of mononuclear cells per 10<sup>4</sup> mononuclear cells required to yield detectable infection of 50% Tzm-bl cells (CID<sub>50</sub>). **(B)** CD4+ T cell-associated proviral DNA and **(C)** Viral RNA loads reported as copy number/million CD4+ T cells in PBMCs, lymphoid and GI tissues of adult RMs intravenously infected with SHIV.CH505.375H.dCT. **(D)** Immunofluorescence images of tonsil (left) and colon lymphoid aggregate (right) from 39950 and 38200 infected mice, respectively. Arrows indicate SHIV+ cells. Scale bars represent 50 μm (left) and 100 μm (right).

lymphoid and GI tissue mononuclear cells. Each symbol represents one individual monkey at necropsy (week 32 pi). Medians are indicated as horizontal lines on the dot plots. **(D)** Tonsil and colon sections from the SHIV.CH505.375H.dCT infected adult RM (39950) that demonstrated highest peak plasma VL post-rebound (13000 vRNA copies/mL plasma). Tissue sections were stained with the nuclear marker DAPI (dark blue) to identify cells, and with antibodies specific for CD3 (green) and CD20 (red). Virally-infected cells were identified by *in-situ* hybridization (cyan). Each panel consists of a larger image with the overlay of all markers and 4 smaller side panels of the same field for each individual channel. Arrow colors correspond to the indicated marker. The large image has a scale bar in the lower right corner.

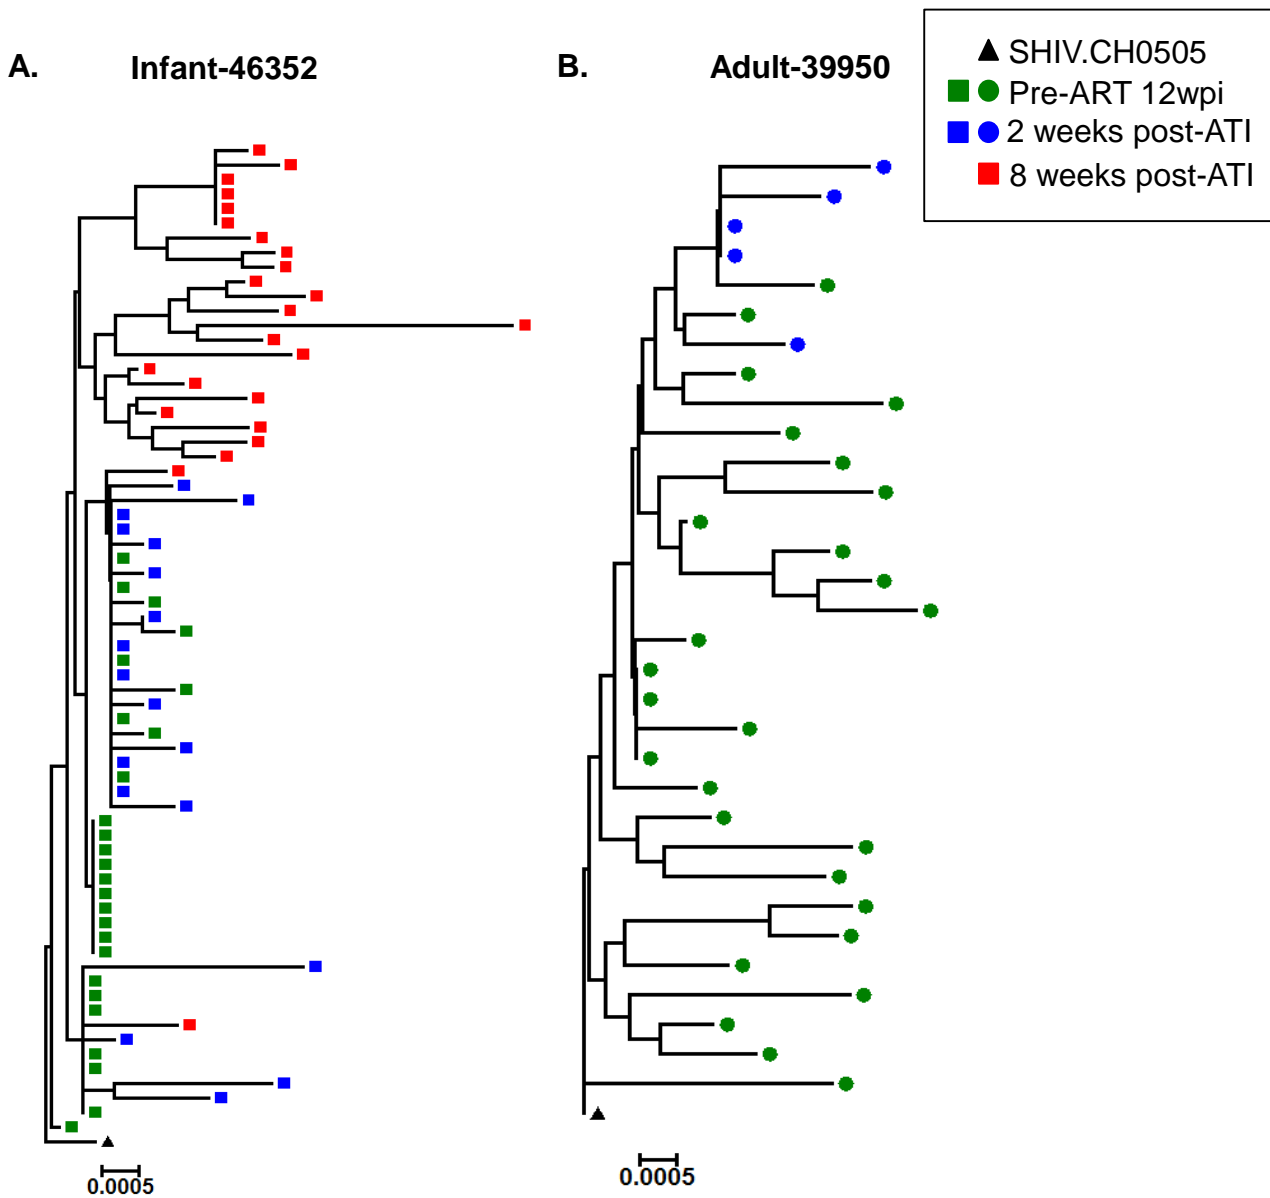

**Figure 5. Phylogenetic tree analysis of the *env* gene sequences obtained from pre-ART and post-ATI plasma of infant and adult RM demonstrating highest peak plasma VL post-rebound.** Standard SGA techniques were used to analyze the *env* gene from pre-ART and post-ATI samples of infants and adult RMs with highest peak rebound plasma VL. Phylogenetic tree representing viral Env diversity in **(A)** infant 46352 and **(B)** adult 39950.

## Antibody Binding

### A. CH505 gp120-specific IgG

### B. % Blocking sCD4

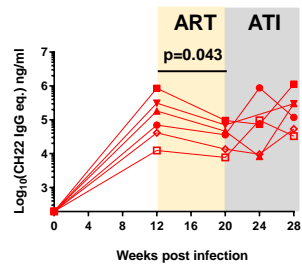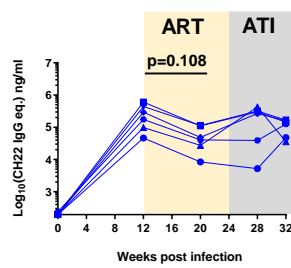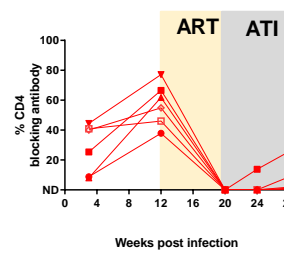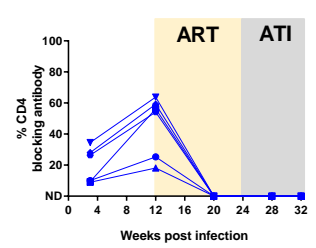

## Neutralization Response

### C. Tier-1 MW965

### D. Autologous CH505 T/F

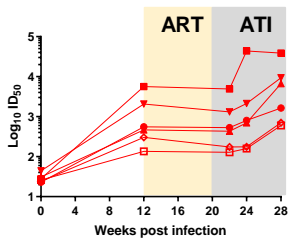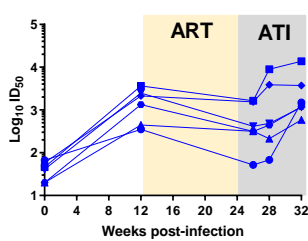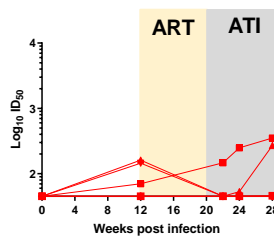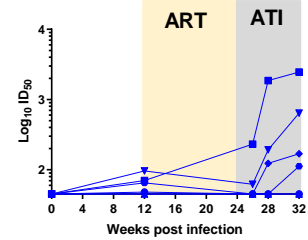

## Non-neutralizing responses

### E. CH505 gp120 ADCC Ab titer

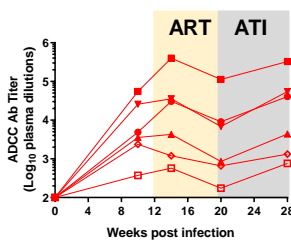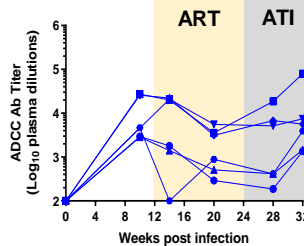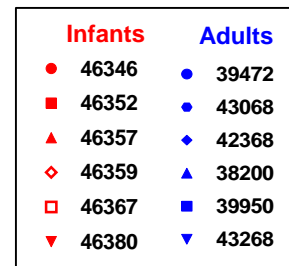

**Figure 6: Magnitude and kinetics of humoral responses to acute SHIV.CH505.375H.dCT infection, during ART and ATI in RMs.** Plasma from infant and adult rhesus macaques were analyzed for **(A)** HIV CH505 gp120 IgG response **(B)** blocking of soluble CD4-gp120 interactions **(C)** tier-1 neutralization response against MW965 **(D)** neutralization response against CH505 T/F, and **(E)** ADCC titer against CH505 gp120-coated target cells. Red symbols represent infant RMs and blue symbols represent adult RMs. Each symbol represents an individual macaque. Yellow and grey boxes represent duration of ART and duration of ATI in the RMs, respectively. Infants with plasma VL<15 copies/mL at 12 w.p.i has been represented with open symbols. P values were calculated using Wilcoxon signed rank test.

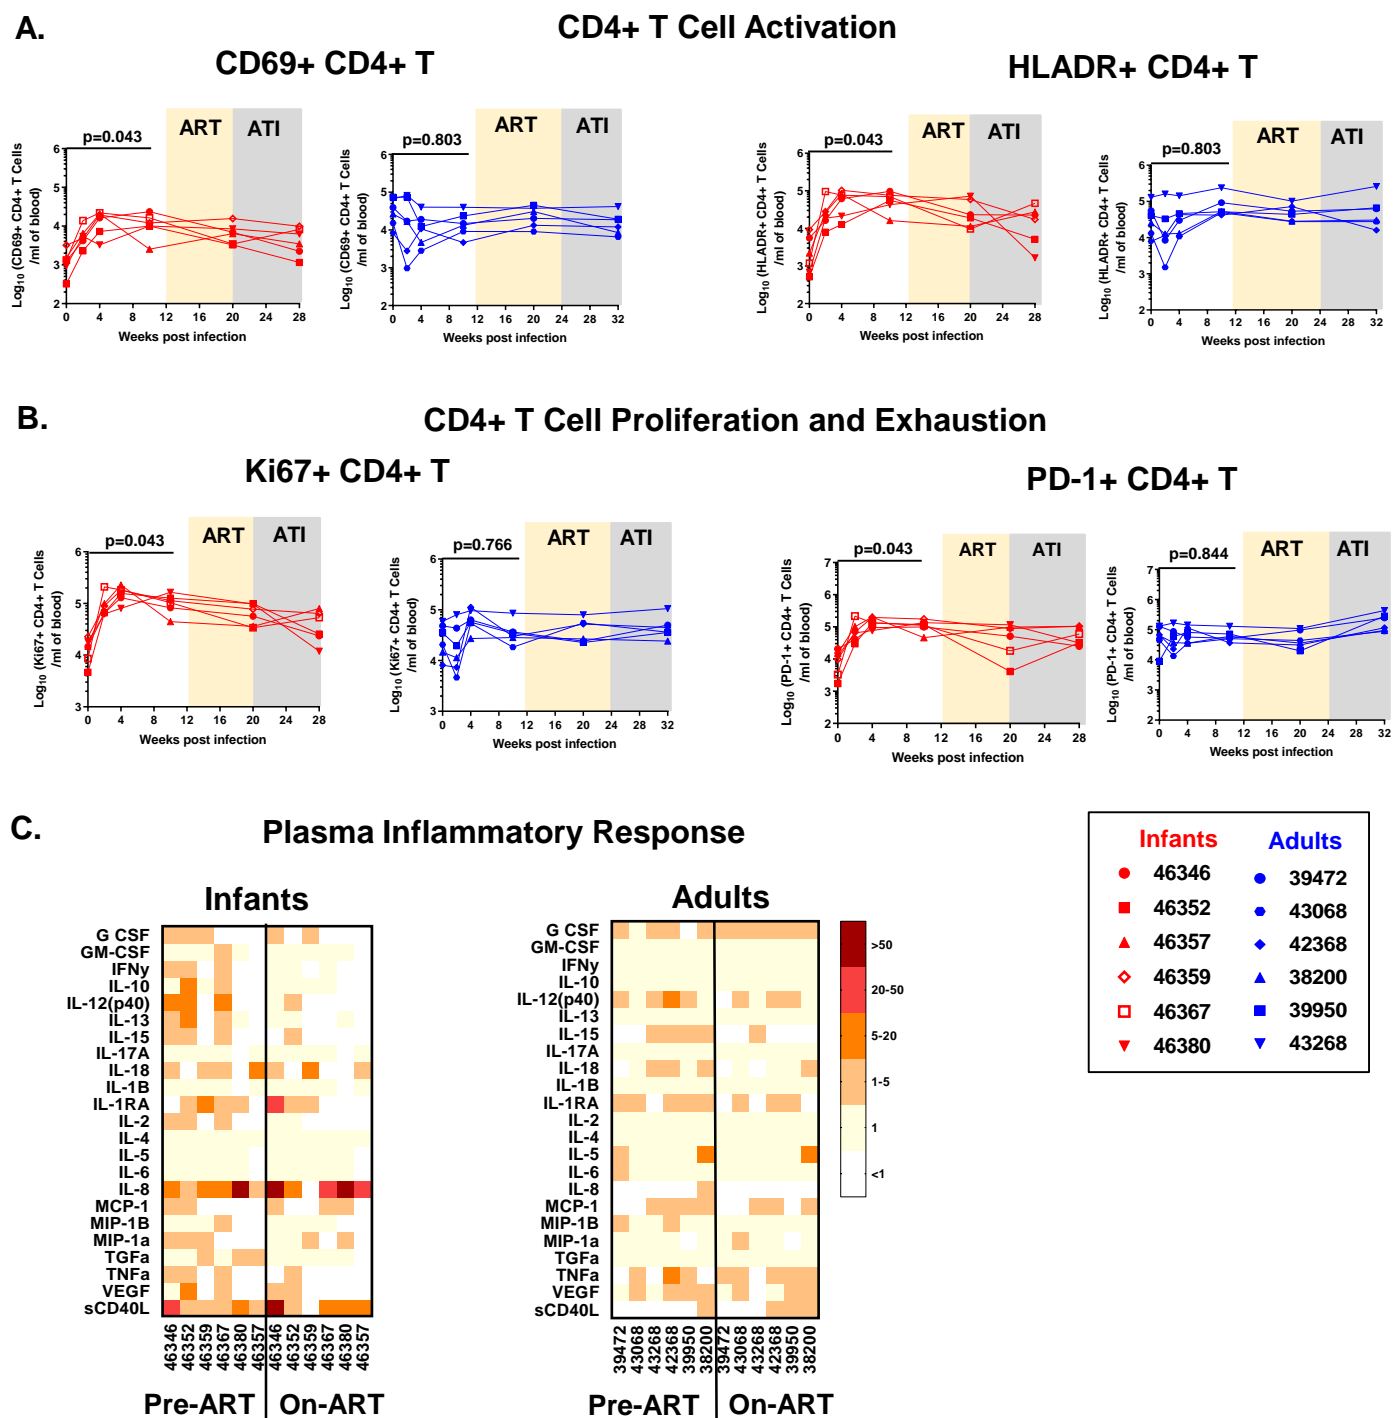

**Figure 7: CD4+ T cell activation and plasma inflammatory responses in SHIV.CH505.375H.dCT infected infant and adult RMs.** Absolute counts per ml blood of (A) activated (CD69+, HLADR+) CD4+ T cells and (B) proliferating (Ki67+ CD4+) and exhausted (PD-1+) CD4+ T cells. Red symbol represents infant RMs and blue symbols represents adult RMs. Each symbol represents one animal. Yellow and grey boxes represent duration of ART and duration of ATI, respectively. (C) Plasma from infected infant and adult RMs

were analyzed by multiplexed luminex assay for expression of cytokines before ART (week 12) and 8 weeks on ART (week 20). Heat map represents fold change of each analyte over pre-infection plasma levels. Infants with plasma VL<15 copies/mL at 12 w.p.i has been represented with open symbols. P values were calculated using Wilcoxon signed rank test.
